1 **Classification:** Biological Sciences; Developmental Biology

2 **Title:** Essential roles of Hdac1 and 2 in lineage development and genome-wide DNA  
3 methylation during mouse preimplantation development

4 **Running title:** Overlapping roles of Hdac1 and 2 in preimplantation embryos

5 **Authors:** Panpan Zhao<sup>a,1</sup>, Huanan Wang<sup>a,1</sup>, Han Wang<sup>a,1</sup>, Yanna Dang<sup>a</sup>, Lei Luo<sup>a</sup>, Shuang Li<sup>a</sup>,  
6 Yan Shi<sup>a</sup>, Lefeng Wang<sup>a</sup>, Shaohua Wang<sup>a</sup>, Jesse Mager<sup>b</sup>, and Kun Zhang<sup>a</sup>

7 **Author Affiliation:** <sup>a</sup>Laboratory of Mammalian Molecular Embryology, College of Animal  
8 Sciences, and Assisted Reproduction Unit, Department of Obstetrics and Gynecology, Sir Run  
9 Run Shaw Hospital, School of Medicine, Zhejiang University, Hangzhou, Zhejiang 310058,  
10 China; <sup>b</sup>Department of Veterinary and Animal Science, University of Massachusetts, Amherst,  
11 MA 01003, USA

12 **Footnotes:** <sup>1</sup>P.Z., H.N.W., and H.W. contributed equally to this work. <sup>2</sup>To whom  
13 correspondence may be addressed. Email: kzhang@zju.edu.cn

14 **Corresponding Author:** Kun Zhang, Room 301 E Building, 866 Yuhangtang Rd, Hangzhou,  
15 Zhejiang 310058, China, Tel: 86-(571) 8898-2506; Email: kzhang@zju.edu.cn

16 **Keywords:** Preimplantation, Hdac1, Hdac2, Trophectoderm, Pluripotency, DNA methylation

17 **Abstract:** Epigenetic modifications, including DNA methylation and histone modifications,  
18 are reprogrammed considerably following fertilization during mammalian early embryonic  
19 development. Incomplete epigenetic reprogramming is a major factor leading to poor  
20 developmental outcome in embryos generated by assisted reproductive technologies, such as  
21 somatic cell nuclear transfer. However, the role of histone modifications in preimplantation  
22 development is poorly understood. Here, we show that co-knockdown (cKD) of *Hdac1* and *2*  
23 (but not individually) resulted in developmental failure during the morula to blastocyst  
24 transition. This outcome was also confirmed with the use of small-molecule Hdac1/2-specific  
25 inhibitor FK228. We observed reduced cell proliferation and increased incidence of apoptosis  
26 in cKD embryos, which were likely caused by increased acetylation of Trp53. Importantly, both  
27 RNA-seq and immunostaining analysis revealed a failure of lineage specification to generate  
28 trophoctoderm and pluripotent cells. Among many gene expression changes, a substantial  
29 decrease of *Cdx2* may be partly accounted for by the aberrant Hippo pathway occurring in cKD  
30 embryos. In addition, we observed an increase in global DNA methylation, consistent with

31 increased DNA methyltransferases and Uhrf1. Interestingly, deficiency of Rbbp4 and 7 (both  
32 are core components of several Hdac1/2-containing epigenetic complexes) results in similar  
33 phenotypes as those of cKD embryos. Overall, Hdac1 and 2 play redundant functions required  
34 for lineage specification, cell viability and accurate global DNA methylation, each contributing  
35 to critical developmental programs safeguarding a successful preimplantation development.

36

### 37 **Significance**

38 Substantial changes to epigenetic modifications occur during preimplantation development and  
39 can be detrimental when reprogrammed incompletely. However, little is known about the role  
40 of histone modifications in early development. Co-knockdown of Hdac1 and 2, but not  
41 individually, resulted in developmental arrest during morula to blastocyst transition, which was  
42 accompanied by reduced cell number per embryo and increased incidence of apoptosis.  
43 Additionally, we observed a failure of first lineage specification to generate trophectoderm and  
44 pluripotent cells, which were associated with reduced expression of key lineage-specific genes  
45 and aberrant Hippo pathway. Moreover, an increase in global DNA methylation was found with  
46 upregulated Dnmts and Uhrf1. Thus, Hdac1 and 2 play overlapping roles in lineage  
47 development, apoptosis, and global methylation during preimplantation development.

48

### 49 **Introduction**

50 A distinguishing feature of preimplantation development is a remarkable reprogramming of the  
51 epigenome, including DNA modifications and post-translational histone modifications (1, 2).  
52 Aberrant epigenetic reprogramming has been associated with defects in various biological  
53 processes, including DNA replication and embryonic genome activation (EGA), which  
54 eventually leads to early embryonic death (3). Moreover, incomplete epigenetic  
55 reprogramming is a major contributing factor to the poor developmental outcome associated  
56 with the use of assisted reproductive technologies, including in vitro embryo production (IVP)  
57 (4) and somatic cell nuclear transfer (SCNT) (5-10). Indeed, modulation of certain epigenetic  
58 modifications has been proved a viable tool to enhance SCNT rate and obtain live cloned  
59 monkeys (11). However, little is known about the epigenetic regulation of critical  
60 developmental events (e.g. lineage development) and interactions between epigenetic

61 modifications in preimplantation embryos.

62 Histone deacetylase (Hdac) 1 and 2 are highly homologous enzymes present together in  
63 multiprotein complexes, the most extensively characterized being NuRD (12), Sin3 (13), and  
64 CoREST (14), which are conserved ranging from yeast to human (15, 16). Histone acetylation  
65 is well known for its role in transcriptional activation through opening of chromatin and  
66 nucleosome compaction (17). Accordingly, Hdac1/2-containing complexes are traditionally  
67 thought to act as transcriptional corepressors of target genes. However, Hdac1/2-containing  
68 complexes have also been shown to be tethered to actively transcribed genes, suggesting a  
69 critical role in transcriptional activation in certain situations (15, 16, 18, 19).

70 Because of high homology and physical colocalization in large multiprotein complexes, it is  
71 reasonable that Hdac1 and Hdac2 are functionally redundant in multiple biological systems  
72 (20-23). However, specific roles of Hdac1 and 2 have also been documented. For instances,  
73 *Hdac2* is specifically involved in the regulation of memory formation and synaptic plasticity  
74 (24). In contrast, knockout of *Hdac1* results in early lethality at peri-implantation stage (25).  
75 Furthermore, knockdown of both maternal and zygotic *Hdac1* or *Hdac2* by siRNA injection in  
76 preimplantation embryos results in no difference on blastocyst formation (26). These relatively  
77 mild phenotypes in preimplantation embryos may be caused by the functional redundancy of  
78 *Hdac1* and 2. Therefore, the precise role of Hdac1 and 2 and the underlying molecular  
79 mechanisms during preimplantation embryogenesis remain unresolved.

80 In this study, we show that double knockdown of *Hdac1* and 2, but not individually, resulted  
81 in lethality during the morula to blastocyst transition. The developmental failure is  
82 accompanied by a substantial perturbation of the transcriptomes and lineage development in  
83 conjunction with increased incidence of apoptosis, enhanced histone acetylation and genome-  
84 wide DNA methylation. We propose that Hdac1 and 2 play compensatory and essential roles  
85 during preimplantation development, at least partly through modulation of lineage  
86 specification, apoptosis and global DNA methylation.

## 87 **Results**

### 88 **Double knockdown of *Hdac1* and 2 results in developmental arrest during morula to** 89 **blastocyst transition.**

90 Previous RNA-seq (GSE44183, Fig. S1A) and quantitative PCR analysis revealed extensive

91 expression of *Hdac1* and 2 through preimplantation development (27, 28). As anticipated, we  
92 confirmed Hdac1 and 2 concentrated and co-localized in nucleoplasm of blastomeres from 2-  
93 cell to blastocyst stage (Fig. S1B). Moreover, both proteins appear evenly distributed in  
94 trophectoderm cells (TE) and inner cells mass (ICM) in the mouse blastocyst (Fig. S1B).  
95 Overall, these results imply Hdac1 and 2 may play an overlapping role during preimplantation  
96 development.

97 Both *Hdac1* and 2 are maternally derived prior to the occurrence of the major wave of EGA at  
98 2-cell in mice (22, 28). Conditional double knockout of *Hdac1* and 2 in oocytes results in  
99 oogenesis failure (22), prohibiting us from establishing knockout models of both maternal and  
100 zygotic *Hdac1* and 2. We therefore decided to employ two complementary approaches to  
101 investigate the *in vivo* roles for *Hdac1* and 2 in preimplantation development: RNAi and  
102 Hdac1/2-specific small-molecule inhibitor, FK228 (29) (Fig. 1A).

103 The effectiveness of the siRNAs and the inhibitor was verified. Analysis of qPCR revealed  
104 *Hdac1* mRNA level was depleted by approximately 90% from 8-cell to blastocyst stage (n=3,  
105 P<0.05) after microinjection of *Hdac1* siRNA cocktail (H1 KD) relative to control embryos  
106 injected with nonspecific siRNA (NC, Fig. S2A). In accordance, Hdac1 protein abundance was  
107 also depleted (n=3, Fig. S2B). Hdac2 protein abundance was not affected by H1 KD, suggesting  
108 a robust specificity of the siRNA (Fig. S2B). Similarly, the *Hdac2* siRNA cocktail (H2 KD)  
109 produced a 90% knockdown at the mRNA level (n=3, P<0.05; Fig. S2A and 2B). Co-  
110 microinjection of siRNAs targeting *Hdac1* and 2 (cKD) resulted in dramatic decreases in both  
111 endogenous *Hdac1* (above 90% reduction) and *Hdac2* (above 89% reduction) between the 8-  
112 cell to blastocyst stage (n=3, P<0.05; Fig. 1B). Immunoblotting (n=2) and IF (n=3) analysis  
113 confirmed a successful reduction of the amount of Hdac1 and 2 protein in morula and  
114 blastocysts (Fig. 1C and 1D). Because of Hdac1 and 2's critical roles in histone de-acetylation,  
115 IF was performed to determine if histone acetylation was affected. The amount of histone H3  
116 lysine 14 acetylation (H3K14ac) and H4K5ac was increased by 72.9% and 64.4%, respectively,  
117 in cKD embryos relative to controls (n=3, P<0.05; Fig. S3A and 3B). Similarly, treatment of  
118 mouse morula with FK228 increased both H3K14ac (by 116%) and H4K5ac (by 67.0%)  
119 relative to the vehicle control (DMSO; n=3, P<0.05; Fig. S3D and 3E). Taken together, these  
120 results suggest the siRNAs and inhibitor are highly effective in the context of preimplantation

121 development.

122 We next monitored the developmental potential of embryos of NC, H1 KD, H2 KD, and cKD.  
123 No morphological difference was observed in H1 KD and H2 KD groups compared with NC  
124 throughout preimplantation development (Fig. S4A), consistent with a previous study (26).  
125 Both the blastocyst rate (above 80%, Fig. S4B) and total cell number per embryo (Fig. S4C)  
126 were normal in the H1 KD and H2 KD groups. By contrast, the cKD embryos appeared normal  
127 up to the morula stage (Fig. 1E) but more than half of cKD embryos fail to develop into  
128 blastocysts (n=5, P<0.05; Fig. 1F). Cell counting analysis revealed that total cell number per  
129 embryo declined from D3 (D3: 15.6±1.1 vs 9.9±0.9; D4: 37.2±2.8 vs 23.8±2.1; P<0.05; Fig.  
130 1G). To evaluate if the development of cKD embryos was delayed, the embryos were  
131 continually cultured *in vitro* until D5. At D5, the majority of cKD embryos collapsed whereas  
132 NC blastocysts completed hatching, ruling out the possibility of developmental delay (Fig. 1E).  
133 To test the developmental competency of the blastocysts that do develop in cKD groups,  
134 blastocysts were cultured individually to examine if outgrowths could be formed. Consistent  
135 with our previous report (30), the potential to form embryo outgrowth is compromised in H1  
136 KD group, but not H2 KD group (Fig. S4D). In contrast, none of cKD blastocysts are capable  
137 to form outgrowths (0/24 vs 17/20, n=3), even after zona pellucida removal (Fig. 1E). To test  
138 if the *in vivo* environment could alleviate the phenotype, 2-cell embryos of NC and cKD groups  
139 were transferred into surrogates. Embryo transfer analysis revealed that cKD embryos failed to  
140 generate live offspring whereas 22-50% embryos transferred in NC group developed to term  
141 (n=3, Fig. 1H). In sum, these results suggest Hdac1 and 2 play a compensatory role in  
142 supporting preimplantation development.

143 Three experiments were performed to verify the initial siRNA findings. First, an alternative  
144 cocktail of siRNAs targeting 5' and 3' untranslated regions (5' and 3' UTR) of *Hdac1* and 2  
145 was used. Developmental arrest during morula to blastocyst transition was also observed with  
146 reduced blastocyst rate (23.6% vs 95.0% in NC; n=3, P<0.05; Fig. 1I and 1J). Second, the  
147 development of cKD embryos could be rescued (blastocyst rate>70%) by co-injection of  
148 exogenous *Hdac1* and/or *Hdac2* mRNA transcribed *in vitro* that were not targeted by the  
149 siRNAs (n=3, P<0.05; Fig. 1I, 1J, S4E, and S4F). Last, treatment of mouse morula with FK228  
150 also resulted in reduced blastocyst rate (24.3% vs 77.9% in control group, n=3, P<0.05) and

151 total cell number per embryo (34 vs 21, n=3; Fig. 1K). Overall, a combination of loss of  
152 function approaches (RNAi plus small-molecule inhibitor) and rescue experiments confirm the  
153 specificity of our approach and the essential role of Hdac1 and 2 in preimplantation  
154 development.

### 155 **Effect of cKD on transcriptomic profile of preimplantation embryo**

156 To delineate the molecular basis of the developmental arrest of cKD embryos, we carried out  
157 RNA-seq in NC and cKD morulae, obtained prior to the emergence of morphological  
158 phenotypes (to avoid bias, Fig. 2A). Hierarchical clustering revealed a separation between NC  
159 and cKD morulae (n=3; Fig. S5A). We found that 991 genes were differentially expressed (Fold  
160 changes (FC) >2 or <0.5, P adjusted<0.05; Table S1), 72% of which were upregulated,  
161 consistent with the notable role of Hdac1/2 as transcriptional repressors. Expression of select  
162 genes (Down: *Myc*, *Dab2*, *Amot*, *Fgfr2*, and *Otx2*; Up: *Arid3a* and *Sfmbt2*; No change: *Tet1*  
163 and *Ctnnb1*) was confirmed by qPCR analysis (Fig. 2B).

164 Gene ontology (GO) analysis revealed that the top GO terms (biological processes) enriched  
165 in differentially expressed genes (DEGs; FC>2 or <0.5) include processes involved in DNA  
166 transcription, cell differentiation, cell proliferation and apoptosis (Fig. S5B). Specifically, GO  
167 analysis of downregulated genes (FC<0.5) showed that enriched GO terms include  
168 transcription factor activity, cell proliferation, apoptosis, NAD dependent Hdac activity and  
169 NuRD complex (Fig. 2C). Moreover, KEGG analyses revealed top hits in signaling pathways  
170 regulating pluripotency, MAPK, P53 and Hippo signaling (Fig. 2E).

171 Among the downregulated genes, we observed an over-representation of TE specific genes  
172 (*Cdx2*, *Dab2*, *Fgfr2*), genes associated with Hippo signaling (*Tead4*, *Amot*, *Lats2*) and genes  
173 related with pluripotency networks (*Nanog*, *Klf5*, *Sox2*, *Pou5f1*, *Myc*) (Fig. 2C). Among the  
174 upregulated genes, we observed an enrichment of genes related to cell cycle progression and  
175 apoptosis (*Trp53*, *Ccnd1*, *Ccnd3*, *Cdkn1b*, *Cdkn1c*, *Cdkn2a*) and genes related to chromatin  
176 modification, including *Dnmt1* and *Uhrf1* (Fig. 2C). Taken together, the transcriptome profiling  
177 implies that embryos lacking Hdac1 and 2 do not properly initiate early lineage differentiation,  
178 cell proliferation, and genome-wide methylation in preimplantation embryos.

179 **Hdac1 and 2 reduction leads to increased apoptosis, increased Trp53 acetylation and**  
180 **defective proliferation in preimplantation embryos**

181 Because total cell number per embryo was drastically reduced in cKD (Fig. 1G) and RNA-seq  
182 analysis in cKD embryos identified genes related with apoptosis among the DEGs (Fig. 2D),  
183 we performed assays to test if apoptosis was abnormal in cKD embryos. The incidence of  
184 apoptosis was markedly increased in cKD blastocysts (90%, n=10) relative to controls (10%,  
185 n=10) (Fig. 3A).

186 Trp53 is a critical molecule regulating apoptosis and was also upregulated in cKD morulae as  
187 determined by RNA-seq. In addition, Trp53 activity has been shown to be repressed in an  
188 Hdac1-dependent manner through de-acetylation (31). Our results showed that the amount of  
189 Trp53 acetylation at lysine 379 (p53ac) was greater in cKD (Fig. 3B) or FK228-treated embryos  
190 relative to controls (Fig. S6A). To ascertain if Hdac1's deacetylase activity is directly  
191 responsible for Trp53 acetylation in the context of preimplantation development, we performed  
192 mutagenesis at the deacetylase site of *Hdac1* and injected wild-type *Hdac1* (H1 WT) and  
193 mutant *Hdac1* (H1 MUT) mRNA into zygotes (Fig. 3C). No difference was observed in H1  
194 WT-injected embryos relative to uninjected controls (UN; Fig. 3C and 3D). In contrast, there  
195 is a dramatic increase of p53ac in H1 MUT-injected embryos (Fig. 3D). Overall, these results  
196 indicate Hdac1's enzymatic activity is directly responsible for deacetylation of the non-histone  
197 protein, Trp53, during preimplantation stages.

198 To ascertain if cell proliferation was affected by cKD, we performed IF against histone H3  
199 serine 10 phosphorylation (pH3S10), a marker for late G2/M phase. Only 16.2% of blastomeres  
200 in control morulae were subject to mitosis whereas the incidence of pH3S10 positive  
201 blastomeres was increased significantly in cKD embryos (27.7%; Fig. 3E), suggesting a cell  
202 cycle block at G2/M phase.

203 Interphase bridges have recently been identified as a critical subcellular structure for mouse  
204 preimplantation embryos (32). As anticipated, interphase bridges were detected at cell-cell  
205 junctions in control embryos (Fig. S6B arrows). Number of interphase bridges in H1 KD or H2  
206 KD embryos is comparable or increased relative to controls but was reduced in cKD embryos  
207 (Fig. S6B), suggesting an aberrant cellular communication in the absence of Hdac1/2.

### 208 **Double knockdown of Hdac1 and 2 results in failed lineage specification of trophectoderm** 209 **and inner cell mass**

210 Transcriptome profiling revealed substantial enrichment of TE-specific and pluripotency

211 network genes among DEGs (Fig. 2C). The earliest lineage specification takes place during the  
212 morula to blastocyst transition and generate TE (precursors of the majority of placental cells)  
213 and ICM (precursors of the embryo proper), we thus decided to examine the cell differentiation  
214 program in cKD embryos. We quantified the expression of *Cdx2*, a critical molecular marker  
215 of TE. Abundance of *Cdx2* mRNA was unchanged through blastocyst stage in H2 KD embryos  
216 and downregulated slightly in H1 KD morulae and blastocysts (Fig. S7A). IF results displayed  
217 a normal distribution of *Cdx2* signal in both H1 and H2 KD embryos (Fig. S7B). In contrast,  
218 *Cdx2* mRNA and protein were diminished in cKD embryos during the morula to blastocyst  
219 transition (Fig. 4A-C), which was confirmed in FK228-treated embryos (Fig. 4D and 4E). The  
220 expression of *Cdx2* in cKD embryos could be successfully rescued by injection of either *Hdac1*  
221 or *2* mRNA (Fig. 4F and 4G). To further determine if reduced expression of *Cdx2* was cell-  
222 autonomous, we injected siRNAs into one of two blastomeres at 2-cell stage and *H2B-RFP*  
223 was used as a lineage-tracing marker (Fig. 4H). Surprisingly, we found *Cdx2* disappeared not  
224 only in blastomeres derived from siRNA-injected but un-injected cells, suggesting *Hdac1/2* is  
225 involved in regulation of signaling molecules upstream of *Cdx2* expression (Fig. 4H).

226 We next examined if the molecular signature of ICM was disrupted in embryos lacking *Hdac1*  
227 and *2*. Expression of *Oct4*, *Nanog* and *Sox2* at both mRNA and protein level was unchanged  
228 in H1 or H2 KD embryos (Fig. S8A and 8B). However, mRNA level of *Oct4*, *Nanog* and *Sox2*  
229 was reduced in cKD groups during the morula to blastocyst transition (Fig. 5A). Similarly,  
230 FK228 treatment led to a decrease in mRNA abundance of *Oct4* and *Nanog* (Fig. S8C). IF  
231 results indicated no significant change of *Oct4* signal, however, *Nanog* and *Sox2* levels were  
232 dramatically decreased in cKD blastocysts (Fig. 5B-C and Fig. S8E), which was also confirmed  
233 using FK228 (Fig. S8D). Collectively, these data demonstrate a failure of the first cell fate  
234 decision that normally gives rise to TE and ICM cells.

235 The second lineage specification occurs in the late blastocysts when the ICM differentiates into  
236 epiblast (Epi) and primitive endoderm (PrE). We examined *Gata6*, a marker of PrE, and *Nanog*,  
237 a marker of Epi, to determine if the second lineage specification failed as well. Results showed  
238 *Gata6* and *Nanog* are mutually exclusively distributed in ICM in control blastocysts, however,  
239 no *Gata6* and *Nanog* positive cells were visible in cKD embryos (Fig. S8F), confirming a  
240 failure of the earliest two lineage specification programs in mouse preimplantation embryos.



## 241 **Abnormal Hippo pathway in embryos deficient of both Hdac1 and 2**

242 Hippo pathway components were enriched in GO analysis of DEGs between cKD and control  
243 morulae (Fig. 2E). Hippo pathway plays a critical role in defining TE specification program  
244 during mouse preimplantation development (33). Starting from the morula stage, Tead4 and  
245 Yap1 act as upstream regulators of Cdx2 and localize in the nucleus of TE cells (33). IF results  
246 showed that no visible difference was detected in Tead4 and Yap1 in H1 or H2 KD embryos  
247 (Fig S9A-C). However, *Tead4* mRNA was reduced in cKD from 8-cell to blastocyst stage while  
248 *Yap1* mRNA was slightly reduced (Fig 6A). IF analysis revealed that the number of Tead4  
249 positive blastomeres was reduced by 50% in cKD group (Fig 6B and 6C). Immunoblotting  
250 analysis further confirmed that the protein abundance of Tead4 was diminished in cKD morulae  
251 (Fig 6D). Additionally, the percent Yap positive cells declined by 75% in cKD groups relative  
252 to controls (Fig 6E and 6F). Lats1 and Lats2 are upstream molecules that modulate the activity  
253 of Yap (34). Our qPCR results documented that mRNA of both genes was reduced significantly  
254 in cKD morulae (Fig S9A), suggesting their abnormal expression could account for defective  
255 Hippo signaling that we observed in the absence of Hdac1/2 activity.

## 256 **Genome-wide DNA methylation was enhanced in blastocysts deficient of both Hdac1 and** 257 **2**

258 A wave of genome-wide DNA demethylation occurs after fertilization through preimplantation  
259 development, the molecular mechanism of which remains unclear (1). Changes in the  
260 expression of *Dnmt1* and *Uhrfl* were notable in our RNA-seq analysis given their central role  
261 in DNA methylation (Fig 2E). Thus, we sought to determine the global DNA methylation by  
262 examining 5-cytosine methylation (5mc) and 5-cytosine hydroxymethylation (5hmc), a newly  
263 defined DNA modification. Amounts of both DNA modifications are increased in cKD, but not  
264 in individual KD groups at blastocyst stage (n=3, P<0.05; Fig 7A), which was also seen in  
265 FK228-treated embryos (n=3, Fig S10C). However, little effect was observed on histone H3  
266 lysine 4 trimethylation (H3K4me3), a marker for transcriptional activation, and histone H3  
267 lysine 9 dimethylation (H3K9me2), a marker for transcriptional repression (Fig S10A and  
268 S10B).

269 Previous studies report Hdac1 physically interacts with DNA methyltransferases (Dnmts) and  
270 regulates the stability of Dnmt1 (35-38). There are three Dnmts present in preimplantation

271 embryos: Dnmt1, 3a and 3b. Uhrf1 is a Dnmt1-interacting protein involved in the recruitment  
272 of Dnmt1 to maintain DNA methylation (39). The amount of Uhrf1 was increased not only in  
273 the nuclear but also in the cytoplasm in cKD blastocysts relative to control (n=3; Fig 7B). We  
274 have not found Dnmt1 antibody available for IF. However, immunoblotting analysis revealed  
275 an increase in Dnmt1 abundance when Hdac1/2 were inhibited (Fig S10E). In addition, Dnmt3a  
276 and 3b were barely detected in control mouse blastocysts whereas their signal intensity was  
277 significantly improved in cKD or FK228-treated embryos (Fig 7C, 7D and S10D). In summary,  
278 we conclude Hdac1 and 2 are critical for maintaining global DNA methylation properly through  
279 modulating the amount of Dnmts in preimplantation embryos.

### 280 **Double knockdown of Rbbp4 and 7 results in similar phenotypes as Hdac1/2 cKD** 281 **embryos**

282 Rbbp4 and 7 (also known as RbAp48 and 46) are two homologous chromatin-binding proteins  
283 that interact with Hdac1/2 to form the core components of multiple transcriptional corepressors,  
284 including Sin3a, NuRD, and CoREST (15)(Fig 8A). Both proteins have direct interactions with  
285 histone tails and are potentially responsible for recruitment of Hdac1/2-containing complexes  
286 to target sites. We next performed RNAi experiment to examine the functional consequences  
287 after knocking down Rbbp4 and 7. Effectiveness of siRNAs targeting *Rbbp4* and 7 was verified  
288 by IF analysis (Fig S11A and B). Analysis of embryogenesis *in vitro* showed that individual  
289 knockdown of Rbbp4 or 7 has no effect on preimplantation development, however, co-  
290 knockdown of Rbbp4 and 7 results in poor blastocyst rate and reduced total cell number per  
291 embryo at D4 (Fig 8B and C). The phenotype similarity between Rbbp4/7 cKD and Hdac1/2  
292 cKD embryos prompted us to determine if defects in lineage specification and genome-wide  
293 methylation were also found. Both Cdx2 and Nanog were diminished in Rbbp4/7 cKD embryos  
294 (Fig 8D and E). An increase in global 5mc but not 5hmc was found in Rbbp4/7 cKD groups  
295 relative to controls (Fig 8F).

### 296 **DISCUSSION**

297 This report demonstrates that there is a functional redundancy for Hdac1 and Hdac2 in  
298 supporting preimplantation development. Depletion of both Hdac1 and 2 results in embryonic  
299 arrest during the morula to blastocyst transition with greatly disrupted transcriptome-wide  
300 expression profiles. Importantly, we document defects in three critical molecular events. First,

301 Trp53 acetylation was induced and may contribute to increased apoptosis and cell cycle arrest.  
302 Second, lineage specification that generates TE and ICM was dramatically perturbed with  
303 defects including suppressed *Cdx2* expression and aberrant Hippo pathway. And third, a global  
304 increase of DNA methylation. Taken together, the combination of these effects contributes to  
305 the developmental failure of cKD embryos.

306 Double knockdown of Hdac1 and 2 in mouse preimplantation embryos results in  
307 developmental failure to pass blastocyst stage (Fig 1E). Previous studies and our present  
308 results indicate that independent knockdown of *Hdac1* or *Hdac2* does not affect blastocyst  
309 formation, suggesting a dispensable role during preimplantation development (22, 30).  
310 However, the developmental failure of cKD embryos suggests the viability of *Hdac1* or *Hdac2*-  
311 depleted embryos is due to functional redundancy of these closely related genes. In particular,  
312 we found compensatory roles of Hdac1 and Hdac2 in regulation of lineage specification,  
313 genome-wide methylation, and expression of critical genes, such as *Cdx2* and *Nanog*. Overall,  
314 these two enzymes function redundantly during preimplantation development.

315 Transcriptome profiles were disturbed in embryos deficient of Hdac1 and 2. Hdac1/2 cannot  
316 bind to DNA directly. However, they can be tethered to DNA by many distinct transcription  
317 factors including YY1 (40), p130 (41), and Trp53 (42). Moreover, Hdac1/2 are recruited to  
318 DNA as components of multiprotein complexes, including Sin3a, NuRD, and the CoREST,  
319 which are well known for their transcriptional repressor activity. These facts could be the  
320 reason that the majority of DEGs are upregulated genes after double knockdown of Hdac1 and  
321 2.

322 Lysine acetylation occurs not only to histones but various non-histone proteins, such as  
323 mitochondrial and cytosolic proteins (43). Hdac1/2 could also act as a “eraser” of these non-  
324 histone acetylation events (43). Trp53 is one of these non-histone proteins that is subject to  
325 acetylation. Trp53 plays a central role in a variety of biological processes including cell cycle  
326 arrest, DNA damage repair, apoptosis and metabolic changes (44). Our results clearly revealed  
327 the direct role of Hdac1 in acetylation of Trp53. Recently, Ma et al. also demonstrated that  
328 double knockout of Hdac1 and 2 leads to increased Trp53 acetylation. Overall, these results  
329 suggest it is a conserved mechanism on the direct regulation of Hdac1 and 2 on Trp53  
330 acetylation (31).

331 Total cell counting and IF analysis suggest a cell cycle arrest in G2/M phase in cKD embryos.  
332 Previous studies demonstrated Hdac1 and 2 are associated with cell cycle progression across  
333 different cell types or tissues (20, 25, 45, 46). For instance, loss of Hdac1 and 2 in dividing  
334 cells results in a cell cycle block at G1 phase, which is partly attributed to the rise of the CDK-  
335 inhibitors, including p21 and p57 (21). However, we found no difference in p21 and p57  
336 expression in cKD embryos, suggesting a different cell cycle block mechanism.

337 During the morula to blastocyst transition, the first lineage specification occurs with the  
338 regulation of contractility and critical signaling pathways, including Hippo and Notch (33).  
339 Core lineage-specific transcription factors, including *Cdx2* (TE-specific), and *Oct4* and *Nanog*  
340 (ICM-specific), are initially stochastically expressed and are gradually confined to specific  
341 lineages. However, it remains poorly understood how the expression of these factors  
342 themselves is controlled. Deficiency of Hdac1 and 2 results in failure of both the TE and ICM  
343 differentiation program. A dramatic reduction in blastocyst rate was observed and those cKD  
344 blastocyst that do form fail to outgrow, suggesting a lacking of functional ICM and TE. At a  
345 molecular level, expression of key marker genes, *Cdx2*, *Nanog* and *Oct4* were suppressed. In  
346 particular, *Nanog* and *Cdx2* signal was barely seen in cKD embryos. Although the intensity of  
347 *Oct4* was normal, its localization was not restricted to a subset of cells. These results  
348 collectively suggest Hdac1 and 2 are master regulators of the first lineage specification. Both  
349 RNA-seq and qPCR results suggest Hdac1 and 2 are involved the transcription of these key  
350 lineage-specific genes (Fig 2C and 4A-E). Indeed, ChIP-seq analysis shows that Hdac1 is  
351 enriched in active genes in ES and TS cells, such as TE-specific genes *Cdx2*, *Elf5* and *Eomes*  
352 and pluripotency network genes *Oct4*, *Nanog* and *Sox2* (18). These results may warrant further  
353 investigation through low input Chip-seq to determine if Hdac1 and Hdac2 colocalize at these  
354 critical genes during preimplantation stages (47).

355 The Hippo signaling pathway plays a crucial role in the first lineage specification, in particular  
356 for TE-specific program (33). Loss of *Tead4* leads to lethality with a failure to generate  
357 functional TE and triggers downregulation of *Cdx2* (48). As a central component of Hippo  
358 pathway, *Yap* could switch between nucleus and cytoplasm, which is phosphorylation-  
359 dependent. *Yap* acts as a transcriptional activator of *Tead4* to induce TE-specific genes (34).  
360 Both *Tead4* and *Yap* are disrupted in cKD embryos. *Lats1* and *Lats2* are both upstream

361 regulators of Yap1 (34). Their expression was also reduced in cKD embryos. Interestingly,  
362 RNA-seq results also displayed dysregulation of genes in the Hippo pathway (Fig 2E). Thus,  
363 the downregulation of Cdx2 in cKD embryos may be partly due to aberrant Tead4 and Yap1  
364 expression.

365 Our results suggest Hdac1 and 2 are critical for maintaining correct DNA methylation pattern  
366 during preimplantation development. Genome-wide removal of DNA methylation (5mc)  
367 occurs during preimplantation development, contrasting with stable DNA methylation pattern  
368 in somatic cells. There are two types of DNA demethylation: passive DNA demethylation that  
369 is DNA-replication-dependent and active demethylation that is achieved by enzymatically  
370 driven reactions. Our results show that Hdac1 and 2 affect the global active demethylation  
371 through regulating Dnmts and Uhrf1, a critical protein for recruiting Dnmt1 to specific DNA  
372 sequences. Increased Dnmt3a, 3b, and Uhrf1 protein abundance could be explained by  
373 increased transcripts in cKD embryos. However, we cannot rule out the possibility that loss of  
374 Hdac1 and 2 may affect the stability of Dnmts in preimplantation embryos. In contrast, Ma et  
375 al. found conditional knockout of Hdac1 and 2 in mouse oocytes resulted in a global decrease  
376 in DNA methylation and particularly reduced nuclear associated Dnmt3a (38). The discrepancy  
377 suggests a developmental context-dependent role of Hdac1/2 in regulation of Dnmts.

378 Functional analysis of Rbbp4 and 7 suggest these two proteins are critical components for  
379 ensuring functionality of Hdac1/2-containing chromatin complexes. Hdac1/2 and Rbbp4/7 are  
380 shared among several critical transcriptional corepressor, including Sin3a, NuRD and CoREST  
381 (15). Rbbp4/7 interacts directly with histone tails (H3 and H4) and are promising candidates  
382 for recruiting these epigenetic complexes. Interestingly, our results indicate Rbbp4 and 7 play  
383 a redundant function essential for preimplantation development, similar with Hdac1/2 cKD.  
384 We propose that Hdac1/2-Rbbp4/7-containing complexes are critically required for  
385 preimplantation development. Indeed, our previous studies documented an essential role of  
386 Suds3, a component of Sin3a complex, during preimplantation development with critical  
387 functions in lineage specification (30).

388 In summary, we documented a compensatory role of Hdac1 and 2 during preimplantation  
389 development. Hdac1 and 2 are essential for the regulation of cell cycle progression and  
390 apoptosis, which is probably mediated through acetylation of Trp53. Additionally, Hdac1 and

391 2 are required for the first cell differentiation program with a critical role in controlling  
392 expression of key TE and pluripotency-specific genes. In the context of chromatin regulation,  
393 Hdac1/2 are involved in maintaining proper genome-wide DNA methylation with dramatic  
394 effects on the protein abundance of Dnmts. Last but not least, deletion of Rbbp4 and 7, both  
395 structural partners of Hdac1/2 in several epigenetic complexes, results in similar phenotypes  
396 as Hdac1/2 cKD. Further understanding the mechanisms of epigenetic control during these  
397 early key molecular events will help the development of tools to reduce early embryonic  
398 lethality and improve the success of reproductive cloning in mammals.

399

## 400 **MATERIALS AND METHODS**

### 401 **Ethics Statement**

402 All experiments involving lab animals were conducted according to the guidelines for the care  
403 and use of lab animals and approved by Zhejiang University.

### 404 **Mouse embryo culture**

405 Superovulation in B6D2F1 (C57BL/6 × DBA2, Charles River) female mice (8-10 weeks old)  
406 was performed by injecting 10 IU PMSG (San-Sheng pharmaceutical Co. Ltd., Ningbo, China)  
407 followed by 10 IU hCG (San-Sheng pharmaceutical Co. Ltd., Ningbo, China) 46-48 h later. At  
408 20-22 h post-hCG treatment, zygotes were collected from B6D2 F1 female mice mated to  
409 B6D2 F1 males. Hyaluronidase (Sigma, St Louis, MO, USA) was used to remove cumulus  
410 cells. Zygotes were cultured in KSOM at 37°C/5% CO<sub>2</sub>. For FK228 treatment experiment,  
411 mouse morula were treated with Romidepsin (FK228, Depsipeptide, Selleck, 50 nM) for 12  
412 hours. For embryo transfer experiment, 2-cell stage control or cKD embryos were transferred  
413 into the oviduct of pseudo-pregnant female mice (ICR).

### 414 **Outgrowth**

415 For outgrowth formation experiment, individual blastocyst was collected on D4, removed of  
416 zona pellucida or kept intact, and incubated in DMEM (Gibco) containing 10% FBS (Gibco)  
417 on 48-well plates coated with 0.1% Gelatin (Gibco).

### 418 **Microinjection:**

419 siRNAs and mRNAs were microinjected into the cytoplasm of zygote using a Piezo-drill  
420 (Eppendorf, Germany) and Eppendorf transferman micromanipulators. siRNA (20 μM;

421 GenePharma, Shanghai) and/or synthetic mRNA (500 ng/ $\mu$ l) were loaded into microinjection  
422 pipette and constant flow was adjusted to allow successful microinjection. Approximately 10  
423 pl of siRNA and/or mRNA was delivered into the cytoplasm of zygotes or 2 cell blastomere by  
424 microinjection. Sense and antisense sequences of siRNAs used in the present study was listed  
425 in Table S3.

#### 426 ***In vitro* RNA synthesis**

427 Wildtype cDNA for *Hdac1*, *Hdac2* and *H2B-RFP* were cloned into T7-driven vectors. *Hdac1*  
428 mutants (H141A) were constructed as described previously (31). All sequences were confirmed  
429 by Sanger sequencing prior to use. To prepare mRNAs for microinjection, expression vectors  
430 were linearized and then were *in vitro* transcribed, capped and poly(A) tailed using T7  
431 mMESAGE mMACHINE Ultra Kit (Life Technologies, Grand Island, NY, USA) based on  
432 the manual. mRNA was recovered and purified by MEGAclean Kit (Life Technologies, Grand  
433 Island, NY, USA) and the integrity validated by electrophoresis.

#### 434 **TUNEL**

435 The embryos were washed in 0.1% PVP/PBS, fixed in 4% PFA for 10 min and permeabilized  
436 in PBS containing 0.5% Triton X-100 and 0.1% sodium citrate for 30 min. Then, the samples  
437 were incubated in a buffer solution of TDT 10X,  $\text{CoCl}_2$ , 2mM dATP, 0.5 units/ $\mu$ l terminal  
438 deoxynucleotidyl transferase enzyme and 0.5 mM FITC-dUTP for 1 h at 37°C in humidity.  
439 DNA was stained with DAPI. Samples were mounted onto slides and imaged with confocal  
440 microscope system (Zeiss LSM780).

#### 441 **Immunofluorescence**

442 Preimplantation embryos were fixed with 4% paraformaldehyde in PBS for 10 min at room  
443 temperature, permeabilized with 0.5% Triton X-100 for 30 min, then blocked in 10% FBS/0.1%  
444 Triton X-100/PBS for 1 h after 3 times washing in 0.1% Triton X-100 PBS, and incubated with  
445 antibodies (Table S3) 1 h at room temperature or overnight at 4°C followed by incubation with  
446 Alexa Flour secondary antibodies 488, 595 (Invitrogen) at 37°C for 1 h. DNA was stained with  
447 DAPI and samples were mounted and observed with a Zeiss LSM780 confocal microscope  
448 (Zeiss).

#### 449 **Reverse transcription and real time PCR**

450 Total RNA from embryos was extracted using the Arcturus Picopure RNA isolation kit (Life

451 Technologies, Grand Island, NY, USA). cDNA synthesis was performed using a reverse  
452 transcription system (Invitrogen). To quantify gene expression differences between KD and  
453 control groups, real-time PCR was performed on a StepOne™ system using using FastStart  
454 Universal SYBR Green Master (Roche). *H2a* was used as an endogenous control.

#### 455 **Western blotting**

456 Embryos were lysed on ice in RIPA lysis buffer (Beyotime) supplemented with 1 mM  
457 phenylmethylsulfonyl fluoride (Beyotime). Equal numbers of embryos were used in each group.  
458 Protein were separated by 8% SDS-PAGE and transferred to a polyvinylidene fluoride  
459 membrane (Millipore). Then, membrane was blocked with 5% non-fat milk and incubated with  
460 primary antibodies overnight at 4°C and secondary antibodies for 1.5 h at room temperature.  
461 Signals were detected with WESTAR NOVA 2.0 (Cyanagen).

#### 462 **RNA-seq and bioinformatic analysis**

463 At E2.75, embryos were collected from NC and cKD groups (60 embryos per sample, n=3).  
464 Total RNA was isolated from embryos using Picopure RNA isolation kit (Life Technologies,  
465 Grand Island, NY, USA) according to the manufacturer's instruction. Before RNA extraction,  
466  $2 \times 10^6$  copies of RFP and GFP mRNA was added. mRNAs were separated with oligo(dT)25  
467 beads, and was used to prepare sequencing libraries with NEB Next Ultra RNA Library Prep  
468 Kit for Illumina (New England Biolabs). Briefly, mRNA was fragmented and reverse  
469 transcribed. The cDNA library was subject to end repair, poly(A)-tailing, adaptor ligation, and  
470 PCR amplification of 12–15 cycles for sequencing library construction. The library was  
471 sequenced by Illumina Hiseq X Ten and RNA-seq reads were assigned directly to transcripts  
472 and counted with Salmon (<https://combine-lab.github.io/salmon/>)(49, 50). Differential  
473 expression analysis was performed by DESeq2 package with P adjusted <0.05 and fold  
474 change >2 or <0.5). GO and KEGG analysis for enrichment of differentially expressed genes  
475 was determined using the Database for Annotation, Visualization and Integrated Discovery  
476 (DAVID).

#### 477 **Statistical Analysis**

478 Differences between two groups were determined by two-tailed unpaired Student's t tests. All  
479 experiments were repeated at least three times unless otherwise stated. For quantification of IF  
480 results, nuclear areas were outlined based on DAPI signal and mean intensity measured using



481 NIH ImageJ. Signal intensities were normalized to control embryos. A value of  $P < 0.05$  was  
482 considered to be statistically significant. RNA-seq results were analyzed with R  
483 (<http://www.rproject.org>). Results are stated as mean  $\pm$  S.E.M.

#### 484 **Acknowledgments**

485 We thank all members of the K. Zhang laboratories for their helpful discussions; S. Hong (Lab  
486 Animal Core Facility, Zhejiang University) for help in embryo transfer; Alan D. Ealy (Virginia  
487 Tech, Blacksburg, Virginia, USA) for critically reading the manuscript. This work was  
488 supported by National Natural Science Foundation of China (No. 31672416 and No. 31872348)  
489 and the Foundation of Key Laboratory of Veterinary Biotechnology (No. klab201708),  
490 Shanghai, China.

491

#### 492 **References**

- 493 1. Eckersley-Maslin MA, Alda-Catalinas C, & Reik W (2018) Dynamics of the epigenetic landscape during  
494 the maternal-to-zygotic transition. *Nat Rev Mol Cell Biol* 19(7):436-450.
- 495 2. Schultz RM, Stein P, & Svoboda P (2018) The oocyte-to-embryo transition in mouse: past, present, and  
496 future. *Biol Reprod* 99(1):160-174.
- 497 3. Matoba S & Zhang Y (2018) Somatic Cell Nuclear Transfer Reprogramming: Mechanisms and  
498 Applications. *Cell Stem Cell* 23(4):471-485.
- 499 4. Chen Z, *et al.* (2015) Characterization of global loss of imprinting in fetal overgrowth syndrome induced  
500 by assisted reproduction. *P Natl Acad Sci USA* 112(15):4618-4623.
- 501 5. Liu W, *et al.* (2016) Identification of key factors conquering developmental arrest of somatic cell cloned  
502 embryos by combining embryo biopsy and single-cell sequencing. *Cell Discov* 2:16010.
- 503 6. Matoba S, *et al.* (2014) Embryonic development following somatic cell nuclear transfer impeded by  
504 persisting histone methylation. *Cell* 159(4):884-895.
- 505 7. Gao R, *et al.* (2018) Inhibition of Aberrant DNA Re-methylation Improves Post-implantation  
506 Development of Somatic Cell Nuclear Transfer Embryos. *Cell Stem Cell* 23(3):426-435 e425.
- 507 8. Chung YG, *et al.* (2015) Histone Demethylase Expression Enhances Human Somatic Cell Nuclear Transfer  
508 Efficiency and Promotes Derivation of Pluripotent Stem Cells. *Cell Stem Cell* 17(6):758-766.
- 509 9. Zhou C, *et al.* (2019) H3K27me3 is an epigenetic barrier while KDM6A overexpression improves nuclear  
510 reprogramming efficiency. *Faseb J* 33(3):4638-4652.
- 511 10. Liu X, *et al.* (2018) H3K9 demethylase KDM4E is an epigenetic regulator for bovine embryonic  
512 development and a defective factor for nuclear reprogramming. *Development* 145(4).
- 513 11. Liu Z, *et al.* (2018) Cloning of Macaque Monkeys by Somatic Cell Nuclear Transfer. *Cell* 174(1):245.
- 514 12. Xue Y, *et al.* (1998) NURD, a novel complex with both ATP-dependent chromatin-remodeling and histone  
515 deacetylase activities. *Molecular cell* 2(6):851-861.
- 516 13. Hassig CA, Fleischer TC, Billin AN, Schreiber SL, & Ayer DE (1997) Histone deacetylase activity is required  
517 for full transcriptional repression by mSin3A. *Cell* 89(3):341-347.
- 518 14. You A, Tong JK, Grozinger CM, & Schreiber SL (2001) CoREST is an integral component of the CoREST-

- 519 human histone deacetylase complex. *P Natl Acad Sci USA* 98(4):1454-1458.
- 520 15. Ma P & Schultz RM (2016) HDAC1 and HDAC2 in mouse oocytes and preimplantation embryos:  
521 Specificity versus compensation. *Cell Death Differ* 23(7):1119-1127.
- 522 16. Sheikh BN & Akhtar A (2019) The many lives of KATs - detectors, integrators and modulators of the  
523 cellular environment. *Nat Rev Genet* 20(1):7-23.
- 524 17. Robinson PJ, *et al.* (2008) 30 nm chromatin fibre decompaction requires both H4-K16 acetylation and  
525 linker histone eviction. *J Mol Biol* 381(4):816-825.
- 526 18. Kidder BL & Palmer S (2012) HDAC1 regulates pluripotency and lineage specific transcriptional networks  
527 in embryonic and trophoblast stem cells. *Nucleic Acids Res* 40(7):2925-2939.
- 528 19. Wang Z, *et al.* (2009) Genome-wide mapping of HATs and HDACs reveals distinct functions in active and  
529 inactive genes. *Cell* 138(5):1019-1031.
- 530 20. Yamaguchi T, *et al.* (2010) Histone deacetylases 1 and 2 act in concert to promote the G1-to-S  
531 progression. *Gene Dev* 24(5):455-469.
- 532 21. LeBoeuf M, *et al.* (2010) Hdac1 and Hdac2 Act Redundantly to Control p63 and p53 Functions in  
533 Epidermal Progenitor Cells. *Dev Cell* 19(6):807-818.
- 534 22. Ma PP, Pan H, Montgomery RL, Olson EN, & Schultz RM (2012) Compensatory functions of histone  
535 deacetylase 1 (HDAC1) and HDAC2 regulate transcription and apoptosis during mouse oocyte  
536 development. *P Natl Acad Sci USA* 109(8):E481-E489.
- 537 23. Montgomery RL, *et al.* (2007) Histone deacetylases 1 and 2 redundantly regulate cardiac morphogenesis,  
538 growth, and contractility. *Gene Dev* 21(14):1790-1802.
- 539 24. Guan JS, *et al.* (2009) HDAC2 negatively regulates memory formation and synaptic plasticity. *Nature*  
540 459(7243):55-U58.
- 541 25. Lager G, *et al.* (2002) Essential function of histone deacetylase 1 in proliferation control and CDK  
542 inhibitor repression. *Embo J* 21(11):2672-2681.
- 543 26. Ma PP & Schultz RM (2008) Histone deacetylase 1 (HDAC1) regulates histone acetylation, development,  
544 and gene expression in preimplantation mouse embryos. *Dev Biol* 319(1):110-120.
- 545 27. Pengpeng MA & Schultz RM (2008) Histone deacetylase 1 (HDAC1) regulates histone acetylation,  
546 development, and gene expression in preimplantation mouse embryos. *Dev Biol* 319(2):485-486.
- 547 28. Xue ZG, *et al.* (2013) Genetic programs in human and mouse early embryos revealed by single-cell RNA  
548 sequencing. *Nature* 500(7464):593-+.
- 549 29. Furumai R, *et al.* (2002) FK228 (depsipeptide) as a natural prodrug that inhibits class I histone  
550 deacetylases. *Cancer Res* 62(17):4916-4921.
- 551 30. Zhang K, Dai XP, Wallingford MC, & Mager J (2013) Depletion of Suds3 reveals an essential role in early  
552 lineage specification. *Dev Biol* 373(2):359-372.
- 553 31. Ito A, *et al.* (2002) MDM2-HDAC1-mediated deacetylation of p53 is required for its degradation. *Embo*  
554 *J* 21(22):6236-6245.
- 555 32. Zenker J, *et al.* (2017) A microtubule-organizing center directing intracellular transport in the early  
556 mouse embryo. *Science* 357(6354):925-+.
- 557 33. Rossant J (2018) Genetic Control of Early Cell Lineages in the Mammalian Embryo. *Annu Rev Genet*  
558 52:185-201.
- 559 34. Nishioka N, *et al.* (2009) The Hippo Signaling Pathway Components Lats and Yap Pattern Tead4 Activity  
560 to Distinguish Mouse Trophectoderm from Inner Cell Mass. *Dev Cell* 16(3):398-410.
- 561 35. Robertson KD, *et al.* (2000) DNMT1 forms a complex with Rb, E2F1 and HDAC1 and represses  
562 transcription from E2F-responsive promoters. *Nat Genet* 25(3):338-342.

- 563 36. Rountree MR, Bachman KE, & Baylin SB (2000) DNMT1 binds HDAC2 and a new co-repressor, DMAP1,  
564 to form a complex at replication foci. *Nat Genet* 25(3):269-277.
- 565 37. Fuks F, Burgers WA, Godin N, Kasai M, & Kouzarides T (2001) Dnmt3a binds deacetylases and is recruited  
566 by a sequence-specific repressor to silence transcription. *Embo J* 20(10):2536-2544.
- 567 38. Ma P, de Waal E, Weaver JR, Bartolomei MS, & Schultz RM (2015) A DNMT3A2-HDAC2 Complex Is  
568 Essential for Genomic Imprinting and Genome Integrity in Mouse Oocytes. *Cell Rep* 13(8):1552-1560.
- 569 39. Bostick M, *et al.* (2007) UHRF1 plays a role in maintaining DNA methylation in mammalian cells. *Science*  
570 317(5845):1760-1764.
- 571 40. Yang WM, Inouye C, Zeng YY, Bearss D, & Seto E (1996) Transcriptional repression by YY1 is mediated by  
572 interaction with a mammalian homolog of the yeast global regulator RPD3. *P Natl Acad Sci USA*  
573 93(23):12845-12850.
- 574 41. Magnaghi-Jaulin L, *et al.* (1998) Retinoblastoma protein represses transcription by recruiting a histone  
575 deacetylase. *Nature* 391(6667):601-605.
- 576 42. Juan LJ, *et al.* (2000) Histone deacetylases specifically down-regulate p53-dependent gene activation. *J*  
577 *Biol Chem* 275(27):20436-20443.
- 578 43. Narita T, Weinert BT, & Choudhary C (2019) Functions and mechanisms of non-histone protein  
579 acetylation. *Nat Rev Mol Cell Bio* 20(3):156-174.
- 580 44. Kruiswijk F, Labuschagne CF, & Vousden KH (2015) p53 in survival, death and metabolic health: a  
581 lifeguard with a licence to kill. *Nat Rev Mol Cell Bio* 16(7):393-405.
- 582 45. Jamaladdin S, *et al.* (2014) Histone deacetylase (HDAC) 1 and 2 are essential for accurate cell division  
583 and the pluripotency of embryonic stem cells. *P Natl Acad Sci USA* 111(27):9840-9845.
- 584 46. Wilting RH, *et al.* (2010) Overlapping functions of Hdac1 and Hdac2 in cell cycle regulation and  
585 haematopoiesis. *Embo J* 29(15):2586-2597.
- 586 47. Hainer SJ, Boskovic A, McCannell KN, Rando OJ, & Fazzio TG (2019) Profiling of Pluripotency Factors in  
587 Single Cells and Early Embryos. *Cell*.
- 588 48. Yagi R, *et al.* (2007) Transcription factor TEAD4 specifies the trophectoderm lineage at the beginning of  
589 mammalian development. *Development* 134(21):3827-3836.
- 590 49. Cao ZB, *et al.* (2015) Transcription factor AP-2 gamma induces early Cdx2 expression and represses  
591 HIPPO signaling to specify the trophectoderm lineage. *Development* 142(9):1606-1615.
- 592 50. Tatsuta T, *et al.* (2005) Expression of Cdx2 in early GRCL of Barrett's esophagus induced in rats by  
593 duodenal reflux. *Digest Dis Sci* 50(3):425-431.
- 594 51. Suzuki S, *et al.* (2015) CHD1 acts via the Hmgpi pathway to regulate mouse early embryogenesis.  
595 *Development* 142(13):2375-+.
- 596 52. Zhao J, *et al.* (2010) Genome-wide Identification of Polycomb-Associated RNAs by RIP-seq. *Molecular*  
597 *cell* 40(6):939-953.
- 598 53. Wang JL, *et al.* (2006) A protein interaction network for pluripotency of embryonic stem cells. *Nature*  
599 444(7117):364-368.

600

601

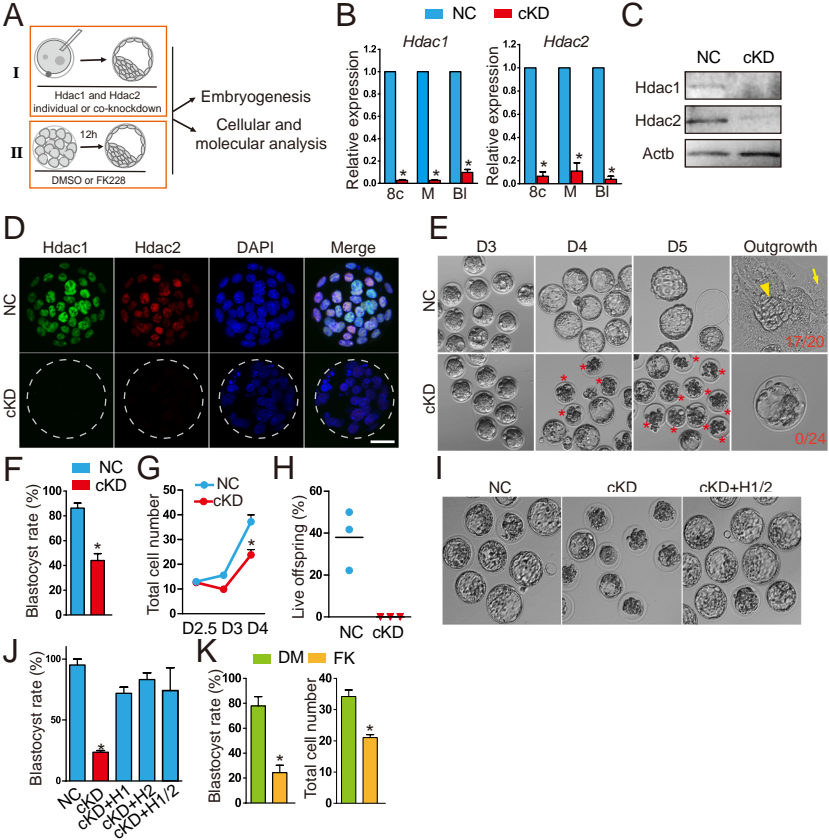

602 **Fig. 1. Double knockdown of Hdac1 and 2 results in embryonic lethality during the**  
603 **morula to blastocyst transition.** (A) Schematic overview of two approaches (I: RNAi; II:  
604 small-molecule inhibitor, FK228) used to investigate *in vivo* roles of Hdac1 and 2 during  
605 preimplantation development. (B) qPCR analysis of knockdown efficiency of siRNA  
606 cocktails targeting Hdac1 and 2 from 8-cell to blastocyst stage. Mouse zygotes derived *in vivo*  
607 were microinjected with Hdac1/2 siRNA cocktails (20  $\mu$ M, 10 pl, cKD) or negative control  
608 siRNAs (NC). Embryos were collected at 8-cell (8c), morula (M) and blastocyst (Bl) stage  
609 (n=3 pools of 5-10 embryos each per treatment). Data were stated as mean  $\pm$  SEM normalized  
610 to endogenous control (*H2afz*; \*P<0.05). (C) Immunoblot analysis of Hdac1 and 2 in NC and  
611 cKD morulae (30 embryos per group, 2 replicates were performed with similar results).  $\beta$ -actin  
612 (*Actb*) was used as a loading control. (D) Immunocytochemical detection of dramatic reduction  
613 of Hdac1 and 2 protein in cKD blastocysts. Three replicates were conducted and at least 10  
614 embryos analyzed in each group (Scale bar: 25  $\mu$ m). (E) Representative photos of NC and cKD  
615 embryos from Day 3 after mating (D3) to D5. Arrow head: ICM outgrowth; Arrow: trophoblast  
616 giant cell. Asterisk: Degenerated embryos. (F) Blastocyst rate in NC and cKD groups at D4  
617 (n=5; 16-33 embryos per group per replicate). Data are shown as mean  $\pm$  SEM (\*P<0.05). (G)  
618 Cell counting analysis of NC and cKD embryos from D2.5 to D4 (n=3). (H) Percent live  
619 offspring out of embryos transferred (n=3; 15-20 embryos were transferred per group). (I and  
620 J) Rescue of cKD embryos by microinjection of exogenous *Hdac1* and/or *Hdac2* mRNA (n=3;  
621 15-20 embryos per group; \*P<0.05). (K) Blastocyst rate and total cell number per embryo in  
622 embryos treated with Hdac1/2 specific inhibitor, FK228 (n=3; 15-20 embryos per group). Data  
623 are expressed as mean  $\pm$  SEM. Different superscripts indicate significant differences (P < 0.05).  
624

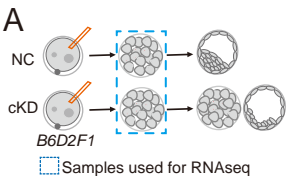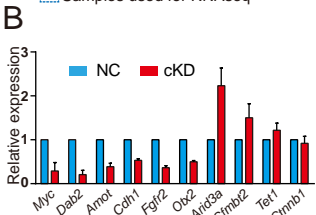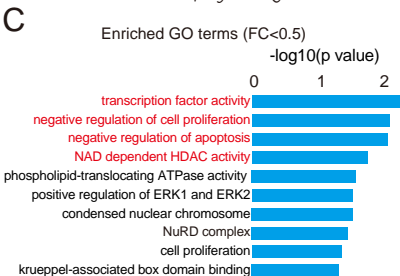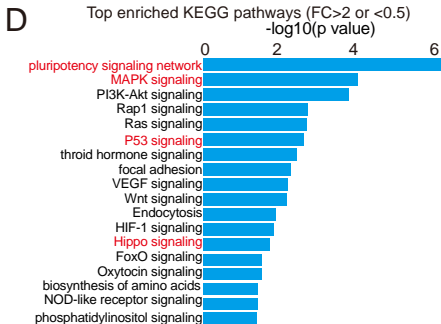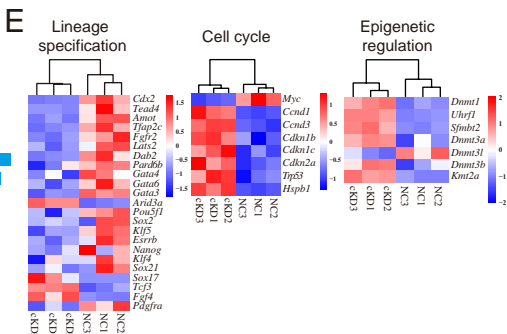

625 **Figure 2. RNA-seq analysis of embryos deficient of Hdac1 and 2.** (A) Schematic overview  
626 of the samples collected for RNA-seq analysis (n=3; 60 embryos/group/replicate). (B)  
627 Validation of RNA-seq results on expression levels of selected genes (Downregulated: *Myc*,  
628 *Dab2*, *Amot*, *Cdh1*, *Fgfr2*, *Otx2*; Upregulated: *Arid3a*, *Sfmbt2*; No change: *Tet1*, *Ctnnb1*).  
629 Three biological replicates were performed with 5-10 morula collected for each group  
630 (\*P<0.05). (C) GO analysis of downregulated genes in cKD morulae. The data indicate  
631 enriched GO terms related to epigenetic regulation, cell proliferation and apoptosis. (D)  
632 KEGG analysis of differentially expressed genes (DEGs) between NC and cKD morulae. The  
633 data indicate cKD leads to abnormal signaling pathway of pluripotency network, P53 and  
634 Hippo. (E) Overrepresentation of genes related to lineage specification, cell cycle and  
635 epigenetic regulation among DEGs.  
636

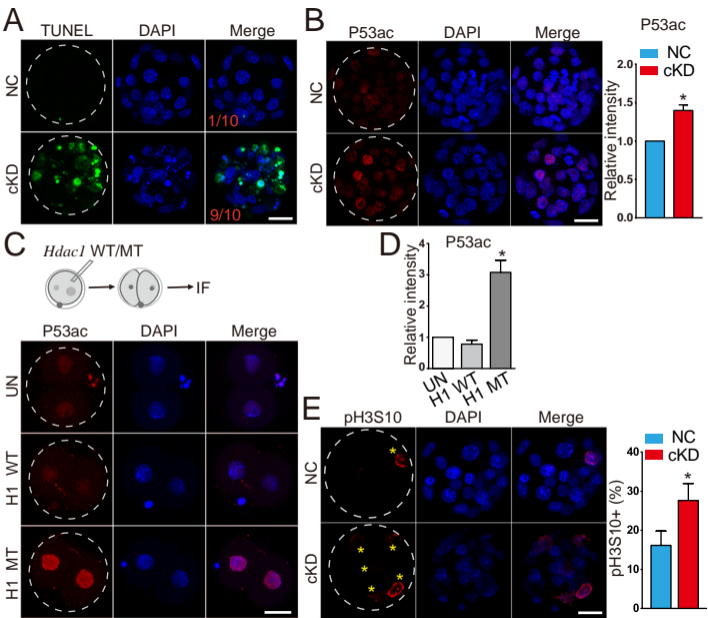



637 **Figure 3. Hdac1 and 2 deficiency leads to increased incidence of apoptosis, increased**  
638 **Trp53 acetylation and cell proliferation arrest.** (A) TUNEL analysis of NC (n=10) and cKD  
639 blastocysts (n=10). The data revealed a dramatic increase of incidence of apoptosis in cKD  
640 blastocysts. Three biological replicates were conducted. (B) Immunocytochemical analysis of  
641 Trp53 acetylated on K379 (P53ac) in blastocysts. The intensity of P53ac was improved  
642 significantly (n=3; 5-10 embryos per group per replicate, Scale bar: 25  $\mu$ m). Nuclear was  
643 counterstained with DAPI. (C) *Hdac1* was mutated at the deacetylase site and mRNA was *in*  
644 *vitro* produced. Wildtype *Hdac1* (H1 WT) and mutant *Hdac1* (H1 MT) was introduced into  
645 zygote and 2-cell embryos were collected for immunocytochemical analysis (n=3; 5-10  
646 embryos per group per replicate, Scale bar: 25  $\mu$ m). (D) The intensity of P53ac was not changed  
647 in H1 WT embryos but increased in H1 MT embryos (\*P<0.05). (E) Immunocytochemical  
648 examination of histone H3 serine 10 phosphorylation (pH3S10), a marker for late G2 and  
649 mitosis, in blastocysts (n=3; 5-10 embryos per group per replicate; Asterisk: pH3S10 positive  
650 blastomere; Scale bar: 25  $\mu$ m).

651

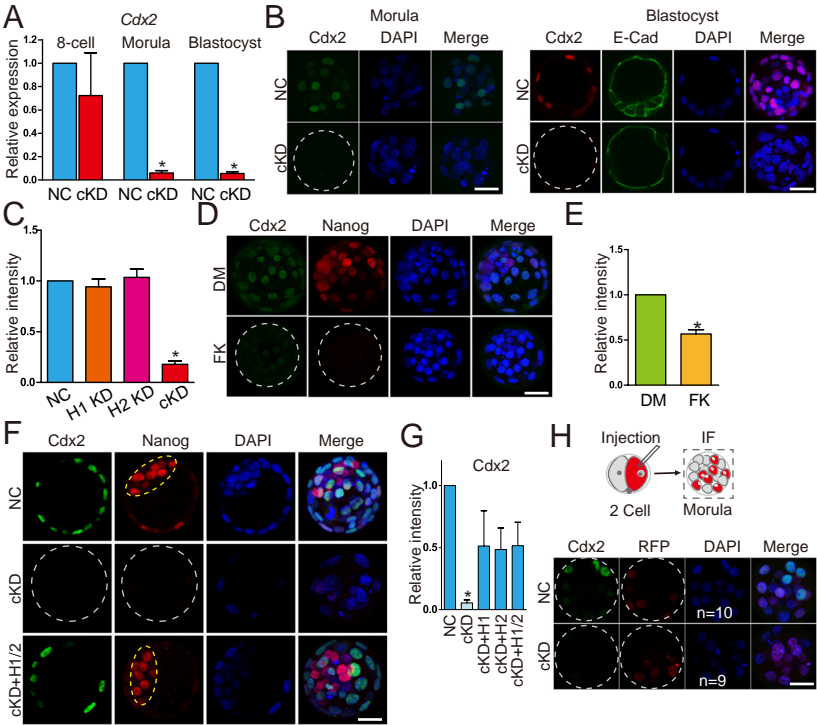

652 **Figure 4. Cdx2 was inactivated in embryos deficient of Hdac1 and 2.** (A) qPCR analysis of  
653 *Cdx2* in 8-cell embryos, morula and blastocysts (n=3 pools of 5-10 embryos each per group).  
654 (B-E) Immunocytochemical analysis of *Cdx2* in morula and blastocysts after RNAi (B and C)  
655 or FK228 treatment (D and E). Three biological replicates with 5-10 embryos analyzed per  
656 group each time. The intensity of *Cdx2* was diminished in cKD and FK228 treated , but not H1  
657 or H2 KD embryos (C and E). E-Cad: E-Cadherin; DM: DMSO; FK: FK228. (F and G) Rescue  
658 of *Cdx2* in cKD embryos after injection of exogenous *Hdac1* or *2*. The experiment was  
659 conducted three times and 5-10 embryos analyzed per group per time. Yellow dashed oval:  
660 inner cell mass. (H) Nonspecific siRNAs or siRNAs cocktail targeting *Hdac1* and *2* were  
661 microinjected into one blastomere at 2-cell stage. *H2B-RFP* mRNA was co-injected as a  
662 tracking marker. Blastocysts were collected for immunocytochemical analysis (n = 3; 5-10  
663 embryos per group per replicate). The intensity of *Cdx2* was diminished not only in cells  
664 derived from the siRNA-injected blastomere but those from noninjected blastomere in cKD  
665 groups.  
666

**A**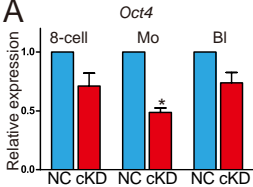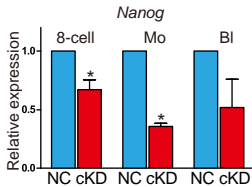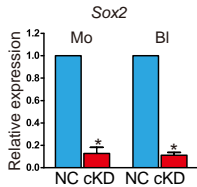**B**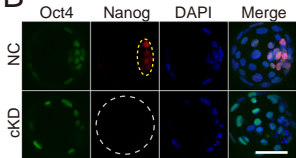**C**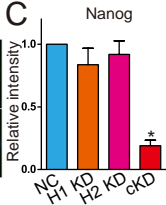**D**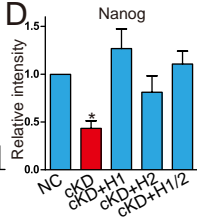**E**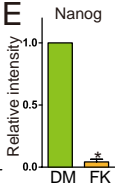

667 **Figure 5. Key pluripotency genes Oct4, Nanog and Sox2 were downregulated in embryos**  
668 **deficient of Hdac1 and 2.** (A) qPCR analysis of *Oct4*, *Nanog* and *Sox2* in NC and cKD  
669 embryos (n=3 pools of 5-10 embryos each per group). (B and C) Immunocytochemical analysis  
670 of Oct4 and Nanog in blastocysts after RNAi. The intensity of Nanog, but not Oct4 was  
671 diminished in cKD embryos (panel C; n=3; 5-10 embryos were analyzed per group each time,  
672 \*P<0.05). Yellow dashed oval: inner cell mass. (D) Rescue of Nanog in cKD embryos after  
673 injection of exogenous *Hdac1* and/or *2*. The experiment was conducted three times and 5-10  
674 embryos analyzed per group per time. (E) Analysis of the intensity of Nanog in embryos treated  
675 with either DMSO (DM, vehicle control) or FK228 (FK).  
676  
677

**A**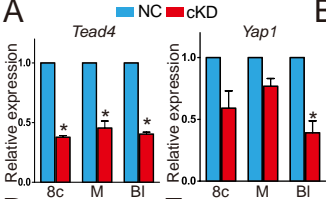**B**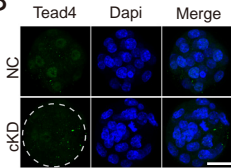**C**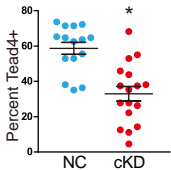**D**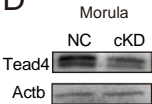**E**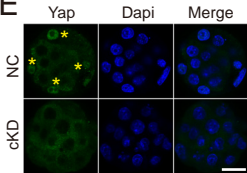**F**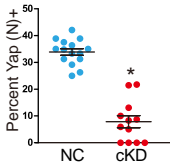

678 **Figure 6. Hda1 and 2 co-knockdown results in aberrant Hippo signaling pathway.** (A)  
679 qPCR analysis of *Tead4* and *Yap1* in 8-cell embryos (8c), morula (M) and blastocysts (Bl) (n  
680 =3 pools of 5-10 embryos each per group). (B-D) Immunocytochemical (n=3; 6-10 embryos  
681 were analyzed per group each time,, \*P<0.05) and immunoblot analysis (n=2 pools of 30  
682 embryos each per group, similar effects were obtained) of Tead4 in morula after RNAi. Both  
683 percent Tead4 positive cells (panel C) and the intensity of Tead4 (panel D) was reduced in cKD.  
684 (E and F) Immunocytochemical analysis of Yap in morula (n=3; 5-10 embryos were analyzed  
685 per group each time). Asterisk: nuclear Yap.  
686

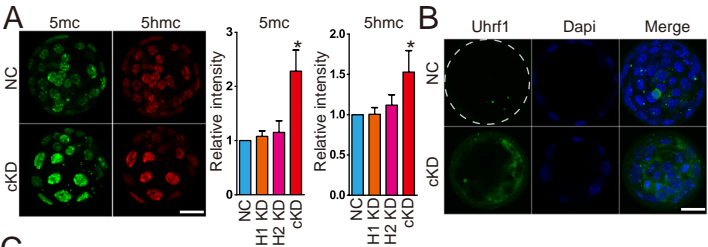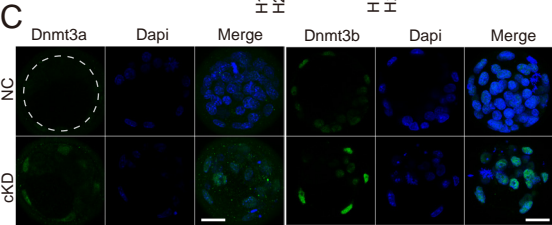



687 **Figure 7. Increased global DNA methylation with upregulated DNA methyltransferases**  
688 **in embryos deficient of Hdac1 and 2.** (A) Immunocytochemical analysis of 5' methylcytosine  
689 (5mc) and 5 hydroxymethylcytosine (5hmc) in blastocysts. Both the intensity of 5mc and 5hmc  
690 was increased in cKD embryos (C and E) (n=3; 5-10 embryos were analyzed per group each  
691 time,, \*P<0.05). (B-C) Hdac1 and 2 deficiency results in increased intensity of Uhrf1, Dnmt3a  
692 and Dnmt3b. The experiment was conducted three times and 8-10 embryos analyzed per group  
693 (\*P<0.05; Scale bar: 25  $\mu$ m).  
694

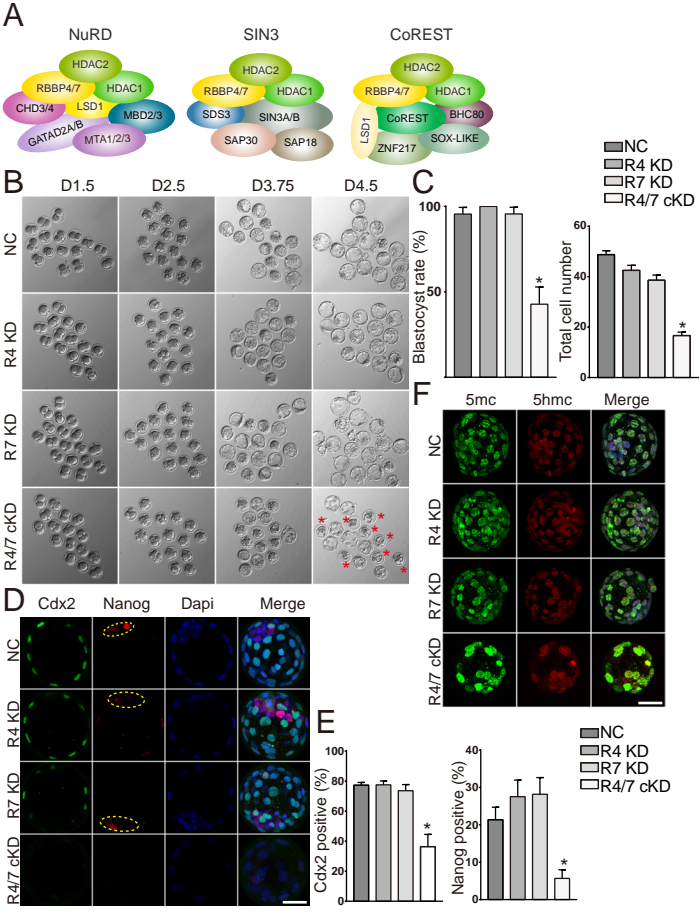

695 **Figure 8. Rbbp4 and 7 deficiency leads to similar phenotypes as in Hdac1/2 cKD embryos.**  
696 (A) Hdac1, Hdac2, Rbbp4, and Rbbp7 are core components in several epigenetic complexes:  
697 NuRD, Sin3, and CoREST. (B) Developmental potential of embryos lacking Rbbp4 and/or  
698 Rbbp7. Three replicates were conducted with 15-20 embryos analyzed per group per replicate.  
699 (C) Blastocyst rate and cell counting analysis of the experiment in panel B. (D) Both Cdx2 and  
700 Nanog were diminished in Rbbp4 and 7 cKD embryos. (E) Cdx2 or Nanog positive blastomeres  
701 were reduced in Rbbp4 and 7 cKD embryos. (F) Immunostaining analysis of 5mc and 5hmc.  
702

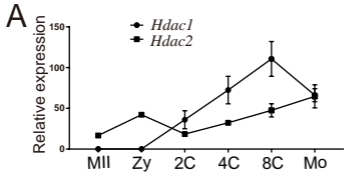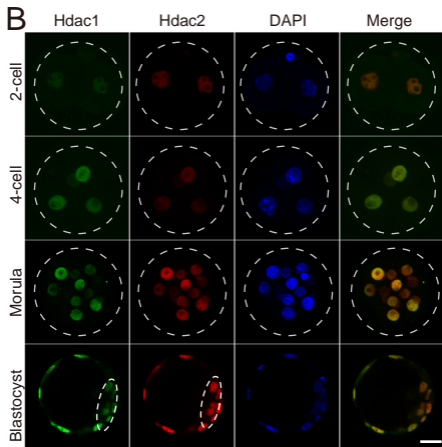

703 **Figure S1. Extensive expression and colocalization of Hdac1 and 2 through**  
704 **preimplantation development.** (A) Analysis of expression level of Hdac1 and 2 from a  
705 previous published single cell RNA-seq datasets (GSE44183). (B) Immunocytochemical  
706 detection of Hdac1 and 2 through preimplantation development. At least 10 embryos were  
707 analyzed and the experiment was performed three times. Scale bar: 25  $\mu\text{m}$ .  
708

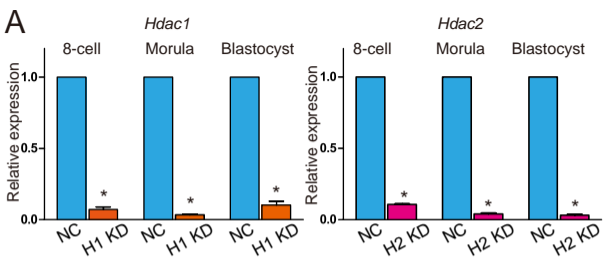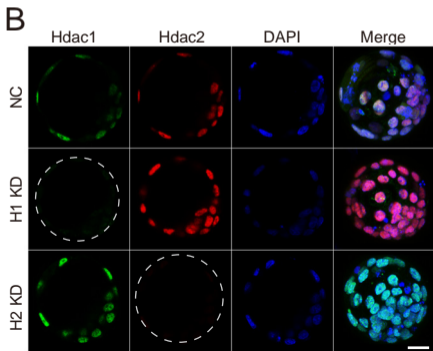

709 **Figure S2. Validation of knockdown efficiency of siRNAs targeting *Hdac1* or *2*.** (A) qPCR  
710 analysis of *Hdac1* or *2* in Hdac1 or Hdac2 KD embryos, respectively (n=3 pools of 5-10  
711 embryos each per group, \*P<0.05). (B) Immunocytochemical analysis of Hdac1 and 2 in Hdac1  
712 or Hdac2 KD embryos (n=3; 5-10 embryos were analyzed per group each time, \*P<0.05). Scale  
713 bar: 25  $\mu$ m.  
714

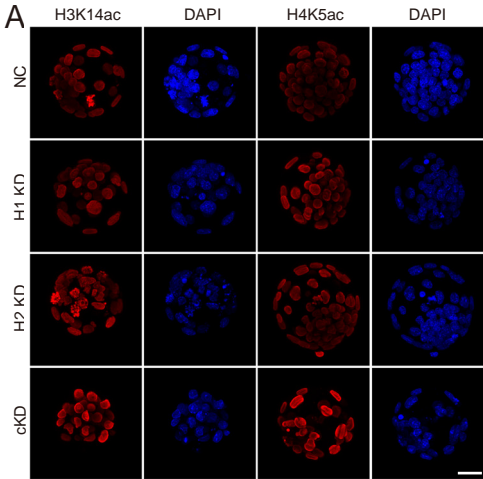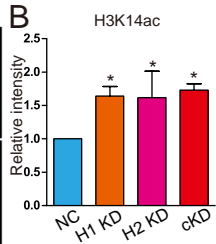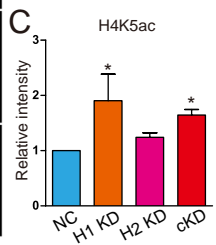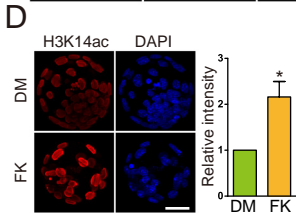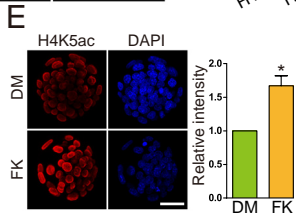



715 **Figure S3. Hdac1/2 co-knockdown or FK228 treatment results in increased intensity of**  
716 **histone H3 lysine 14 acetylation and histone H4 lysine 5 acetylation. (A-E)**  
717 Immunocytochemical analysis of histone H3 lysine 14 acetylation (H3K14ac) and histone H4  
718 lysine 5 acetylation (H4K5ac) in embryos after RNAi (A-C) or FK228 treatment (D and E) (6-  
719 10 embryos were analyzed per group, \*P<0.05). Scale bar: 25  $\mu$ m.  
720

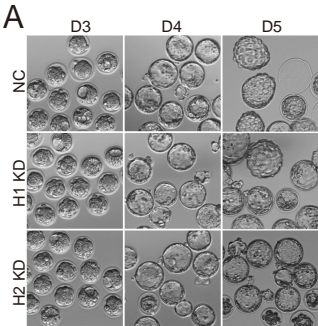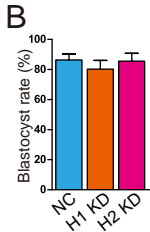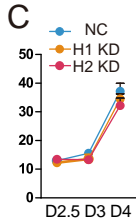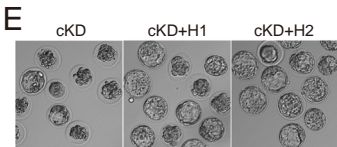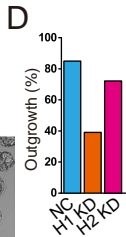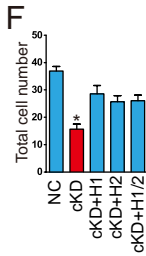

721 **Figure S4. Effects of Hdac1 or 2 individual KD on preimplantation development. (A)**  
722 Representative photos of NC, Hdac1 (H1) KD, and Hdac2 (H2) KD embryos from D3 to D5.  
723 No difference was noted between H1 or H2 KD and NC group through preimplantation  
724 development. (B and C) Blastocyst rate (B) at D4 and total cell number per embryo (C) was  
725 similar among NC, H1 KD, and H2 KD groups (n=3; 15-20 embryos analyzed per group). (D)  
726 Incidence of outgrowth formation for blastocysts derived from NC, H1 KD, and H2 KD  
727 embryos (20-25 embryos analyzed per group). (E and F) Rescue of cKD embryos by injection  
728 of exogenous Hdac1 or Hdac2 mRNA (n=3).  
729

A

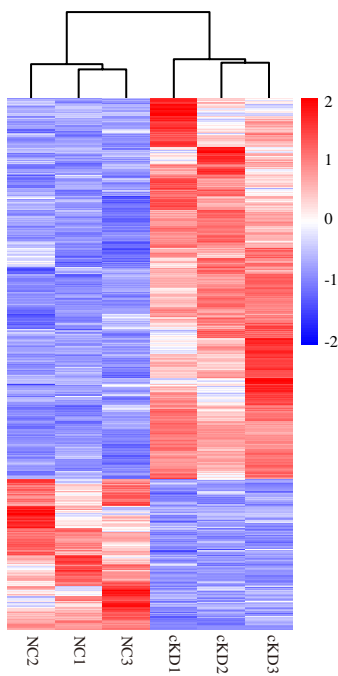

B

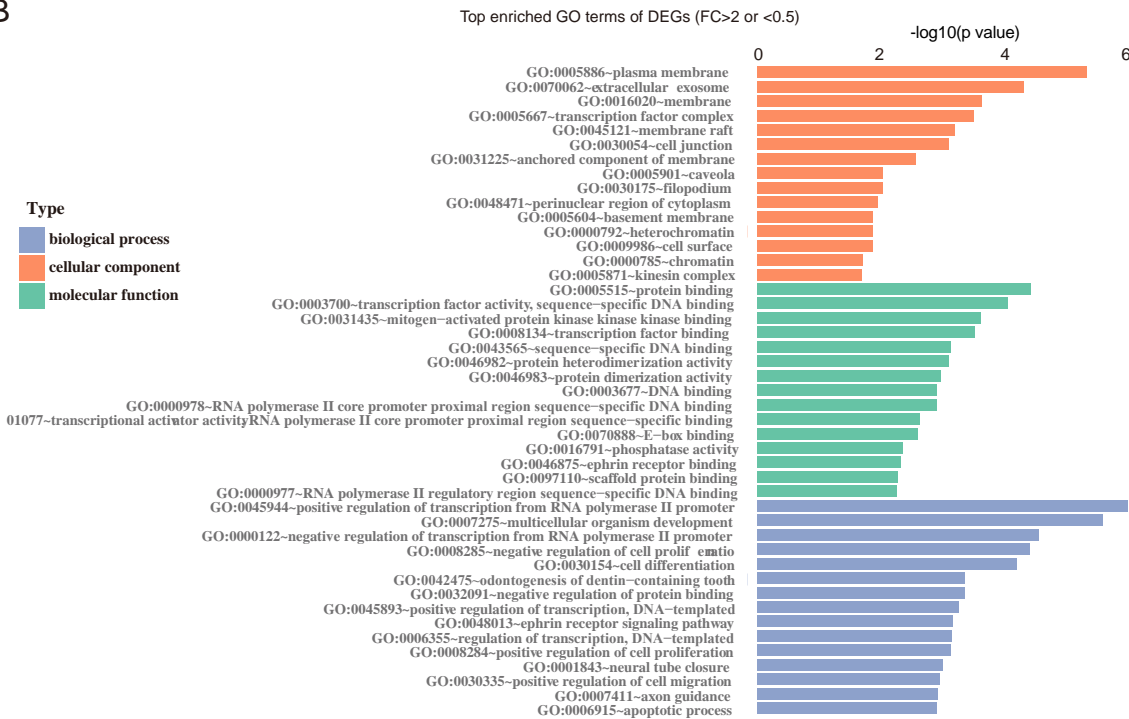

730 **Figure S5. Transcriptomic analysis of embryos deficient of Hdac1 and 2.** (A) Heatmap  
731 showing differentially expressed genes (DEG) between cKD and NC embryos. (B) GO analysis  
732 of all DEGs in cKD embryos related to NC groups.  
733

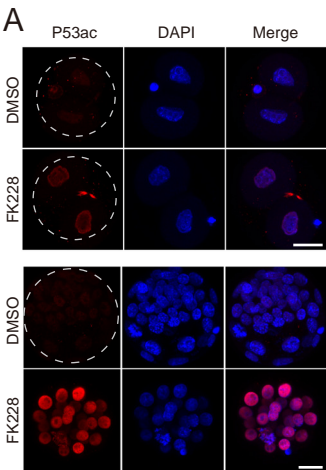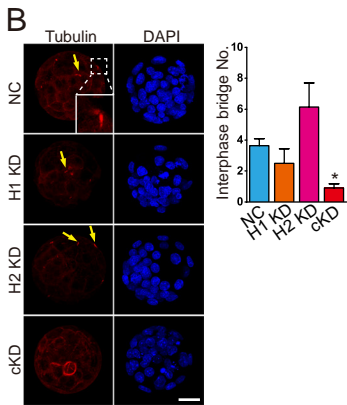

734 **Figure S6. Blockage of Hdac1 and 2 results in increased Trp53 acetylation and aberrant**  
735 **interphase bridge.** (A) Immunocytochemical analysis of Trp53K379 acetylation (P53ac) in 2-  
736 cell embryos and morula. Mouse zygotes or morula were treated with FK228 for 12 h. The  
737 intensity of P53ac was increased dramatically in FK228-treated embryos. (E)  
738 Immunocytochemical examination of  $\alpha$ -tubulin, a marker for interphase bridge, in blastocysts  
739 (Arrows: interphase bridge; n=3; 5-10 embryos were analyzed per group each time, Scale bar:  
740 25  $\mu$ m).  
741

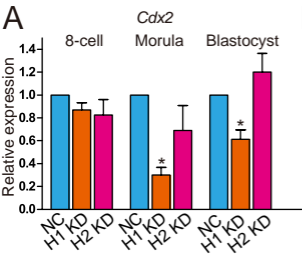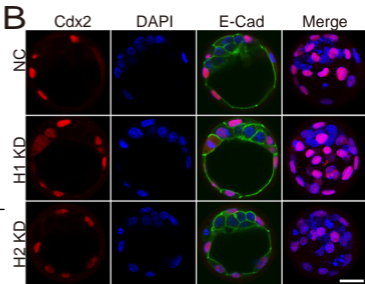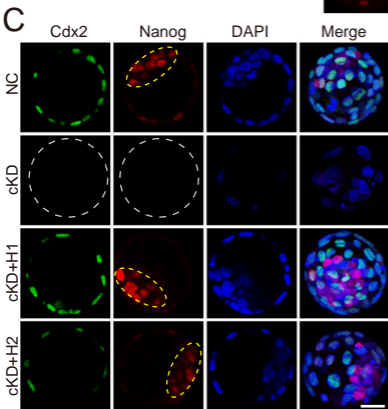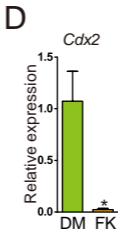



742 **Figure S7. Effects of Hdac1 KD or Hdac2 individual KD on Cdx2 expression.** (A) qPCR  
743 analysis of *Cdx2* in 8-cell embryos, morula and blastocysts (n=3 pools of 5-10 embryos each  
744 per group; \*P<0.05). (B) Immunocytochemical analysis of Cdx2 in morula and blastocysts.  
745 The intensity of Cdx2 was not changed in H1 or H2 KD embryos (n=3; 5-10 embryos were  
746 analyzed per group each time). (C) Rescue of Cdx2 in cKD embryos after injection of  
747 exogenous *Hdac1* and/or 2. The experiment was conducted three times and 5-10 embryos  
748 analyzed per group per time. (D) FK228 treatment results in significant decrease in Cdx2  
749 expression level (n=3; 5-10 embryos were analyzed per group each time, \*P<0.05). Scale bar:  
750 25  $\mu$ m.  
751

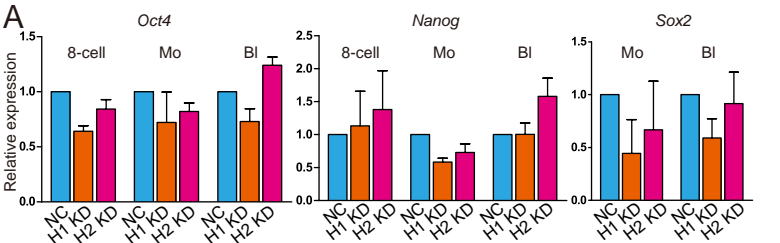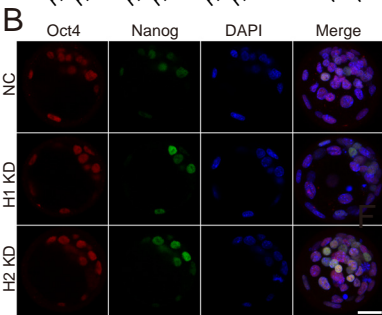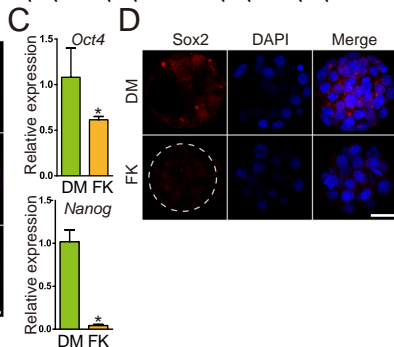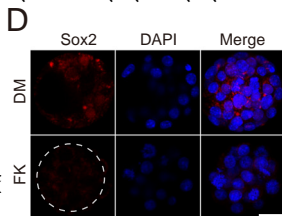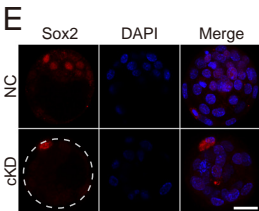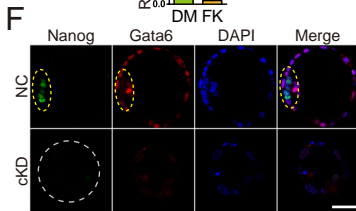

752 **Figure S8. Effects of Hdac1 KD or Hdac2 individual KD on Oct4, Nanog and Sox2.** (A)  
753 qPCR analysis of *Oct4*, *Nanog* and *Sox2* in NC, Hdac1 KD, and Hdac2 KD embryos. (B)  
754 Immunocytochemical analysis of Oct4 and Nanog in blastocysts. (C) qPCR analysis of *Oct4*  
755 and *Nanog* in FK228-treated embryos. (D and E) Immunocytochemical analysis of Sox2 in  
756 cKD or FK228 treated embryos. (F) Immunostaining detection of Nanog and Gata6 in late  
757 blastocysts.  
758

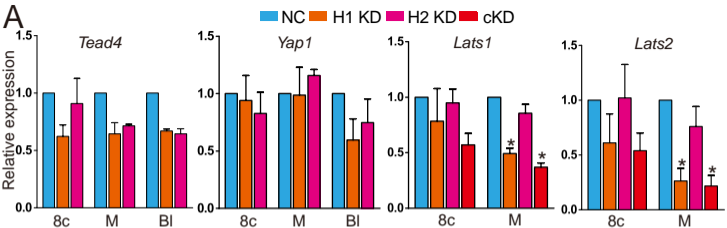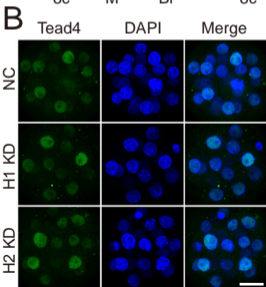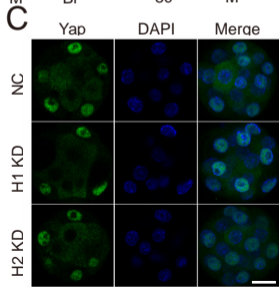

759 **Figure S9. Effects of Hdac1/2 individual KD on Hippo signaling pathway.** (A) qPCR  
760 analysis of *Tead4*, *Yap1*, *Lats1*, and *Lats2* in NC, Hdac1 KD, and Hdac2 KD embryos. (B and  
761 C) Immunocytochemical analysis of Tead4 and Yap in morula deficient of Hdac1 or Hdac2.  
762

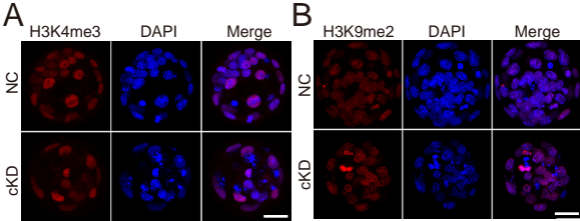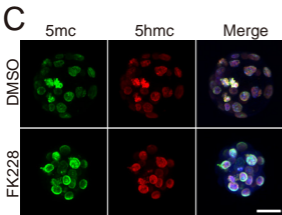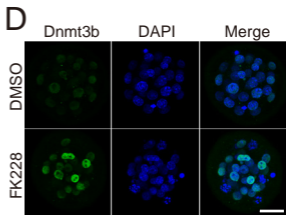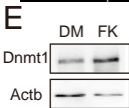

763 **Figure S10. Effects of Hdac1 and 2 cKD on epigenetic modifications.** (A and B)  
764 Immunocytochemical analysis of H3K4me3 and H3K9me2 in morula deficient of Hdac1 and  
765 Hdac2. (C and D) FK treatment results in an increase of DNA methylation (5mc) and Dnmt3b  
766 intensity. (E) Immunoblotting analysis of Dnmt1 in morula/blastocysts treated with DMSO  
767 (DM) or FK228 (FK). Two replicates were performed with 40 embryos used per group and  
768 similar results obtained.  
769

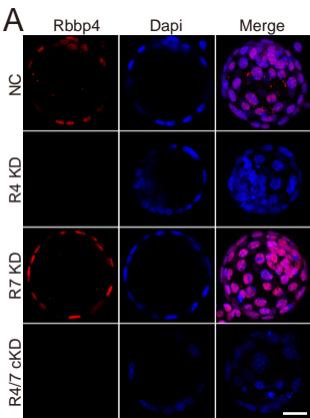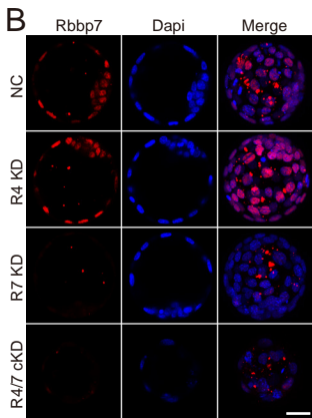



770 **Figure S11. Validation of knockdown efficiency of siRNAs targeting *Rbbp4* or 7. (A-B)**

771 Immunocytochemical analysis of *Rbbp4* and 7 in *Rbbp4* or 7 KD embryos. Scale bar: 25  $\mu$ m.

772

773 **Table S1.**

774 List of differentially expressed genes between control and Hdac1 and 2 cKD embryos  
775 (Supporting Excel file).

776

777 **Table S2.**

778 List of siRNAs and oligos used for qPCR and *in vitro* transcription

| Gene                    | Primer sequences (5'-3')         | References |
|-------------------------|----------------------------------|------------|
| <i>Hdac1 siRNA1</i>     | Sense-GCUUCUGUUACGUCAAUGATT      |            |
|                         | Antisense-UCAUUGACGUAACAGAAGCTT  |            |
| <i>Hdac1 siRNA2</i>     | Sense-GAGUUCGUGAAGAGUUUCATT      |            |
|                         | Antisense-UGAAACUCUUCACGAACUCTT  |            |
| <i>Hdac1 siRNA3</i>     | Sense-GACCGGAUUUCAAGCUUCATT      |            |
|                         | Antisense-UGAAGCUUGAAAUCCGGUCTT  |            |
| <i>Hdac1 UTR siRNA1</i> | Sense-GCUUGGGUAAUAGCAGCCATT      |            |
|                         | Antisense-UGGCUGCUAUUACCCAAGCTT  |            |
| <i>Hdac1 UTR siRNA2</i> | Sense-GUGGAGGUUGAUAGCCUAGTT      |            |
|                         | Antisense-CUAGGCUAUCAACCUCCACTT  |            |
| <i>Hdac2 siRNA1</i>     | Sense-CUCAUAACUUGCUGCUAAATT      |            |
|                         | Antisense-UUUAGCAGCAAGUUAUGAGTT  |            |
| <i>Hdac2 siRNA2</i>     | Sense-GUCCGGUGUUUGAUGGACUTT      |            |
|                         | Antisense-AGUCCAUCAAAACACCGGACTT |            |
| <i>Hdac2 siRNA3</i>     | Sense-GACCGUCUCAUCCAUAATT        |            |
|                         | Antisense-UUUAUGGAAUGAGACGGUCTT  |            |
| <i>Hdac2 UTR siRNA1</i> | Sense-GACUCUCCAACUUUAGGAATT      |            |
|                         | Antisense-UUCCUAAAGUUGGAGAGUCTT  |            |

---

|                  |                                 |  |
|------------------|---------------------------------|--|
| <i>Hdac2 UTR</i> | Sense-UGGCAUGGACUGUAUUUAUTT     |  |
| <i>siRNA2</i>    | Antisense-AUAAAUACAGUCCAUGCCATT |  |

---

|                  |                                |  |
|------------------|--------------------------------|--|
| <i>Hdac2 UTR</i> | Sense-GCCGGAUCUAUUAAGAAATT     |  |
| <i>siRNA3</i>    | Antisense-UUUCUUUAAUAGAUCGGCTT |  |

---

|              |                                                |  |
|--------------|------------------------------------------------|--|
| <i>Hdac1</i> | F-TGAAGCCTCACCGAATCCG<br>R-GGGCGAATAGAACGCAGGA |  |
|--------------|------------------------------------------------|--|

---

|              |                                                    |  |
|--------------|----------------------------------------------------|--|
| <i>Hdac2</i> | F-GGAGGAGGCTACACAATCCG<br>R-TCTGGAGTGTTCTGGTTTGTCA |  |
|--------------|----------------------------------------------------|--|

---

|              |                                                      |      |
|--------------|------------------------------------------------------|------|
| <i>H2afz</i> | F-TCCAGTGGACTGTATCTCTGTGA<br>R-GACTCGAATGCAGAAATTTGG | (51) |
|--------------|------------------------------------------------------|------|

---

|              |                                                  |      |
|--------------|--------------------------------------------------|------|
| <i>Lats1</i> | F-TTTGCAGGCTGCTGGCTTTG<br>R-AGACATCTGCTCTCGACGAG | (49) |
|--------------|--------------------------------------------------|------|

---

|              |                                                  |      |
|--------------|--------------------------------------------------|------|
| <i>Lats2</i> | F-TGCGAGTCATCAAGCAGACC<br>R-ACTTGGCTCTACTGCTGTGC | (49) |
|--------------|--------------------------------------------------|------|

---

|             |                                                      |      |
|-------------|------------------------------------------------------|------|
| <i>Yap1</i> | F-GTCCTCCTTTGAGATCCCTGA<br>R-TGTTGTTGTCTGATCGTTGTGAT | (49) |
|-------------|------------------------------------------------------|------|

---

|              |                                                  |  |
|--------------|--------------------------------------------------|--|
| <i>Tead4</i> | F-TGATGCAGAGGGTGTATGGA<br>R-GATCAGCTCATTCCGACCAT |  |
|--------------|--------------------------------------------------|--|

---

|             |                                                  |      |
|-------------|--------------------------------------------------|------|
| <i>Meg3</i> | F-CGAGGACTTCACGCACAAC<br>R-TTACAGTTGGAGGGTCTCTGG | (52) |
|-------------|--------------------------------------------------|------|

---

|             |                                                       |      |
|-------------|-------------------------------------------------------|------|
| <i>Oct4</i> | F-CTCCCGAGGAGTCCCAGGACAT<br>R-GATGGTGGTCTGGCTGAACACCT | (53) |
|-------------|-------------------------------------------------------|------|

---

---

|               |                                                                |      |
|---------------|----------------------------------------------------------------|------|
| <i>Nanog</i>  | F-CAAGGGTCTGCTACTGAGATGCTCTG<br>R-TTTTGTTTGGGACTGGTAGAAGAATCAG | (53) |
| <i>Cdx2</i>   | F-CAAGGACGTGAGCATGTATCC<br>R-GTAACCACCGTAGTCCGGGTA             |      |
| <i>Fgfr2</i>  | F-GCCTCTCGAACAGTATTCTCCT<br>R-ACAGGGTTCATAAGGCATGGG            |      |
| <i>Sox2</i>   | F-GCGGAGTGGAAACTTTTGTCC<br>R-CGGGAAGCGTGTACTTATCCTT            |      |
| <i>Amot</i>   | F-CCGCCAGAATACCCTTTCAAG<br>R-CTCATCAGTTGCCCTCTGT               |      |
| <i>Myc</i>    | F-ATGCCCCCTCAACGTGAACTTC<br>R-CGCAACATAGGATGGAGAGCA            |      |
| <i>Dab2</i>   | F-CCCCTGAACGGTGATACTGAT<br>R-AAGTCCTGCTTTACGCCATTC             |      |
| <i>Otx2</i>   | F-TATCTAAAGCAACCGCCTTACG<br>R-AAGTCCATAACCGAAGTGGTC            |      |
| <i>Arid3a</i> | F-GCTTGGGACATCCGTCCTC<br>R-CAAATGCCTATCTCCCTCAGC               |      |
| <i>Sfmbt2</i> | F-AAGATAACCGGCTCAGCAAATG<br>R-TCTCTTCCAAATAGTCTCCCCAG          |      |
| <i>Ctnnb1</i> | F-ATGGAGCCGGACAGAAAAGC<br>R-TGGGAGGTGTCAACATCTTCTT             |      |

---

|                    |                                                                                     |
|--------------------|-------------------------------------------------------------------------------------|
| <i>Tet1</i>        | F-CGGGTTTACAATGGCTCTTCG<br>R-GGTTTGGGTGTGACTACTGGG                                  |
| <i>Cdh1</i>        | F-CAGGTCTCCTCATGGCTTTGC<br>R-CTTCCGAAAAGAAGGCTGTCC                                  |
| <i>H2B-RFP CDS</i> | T7-F-TAATACGACTCACTATAGGGAGAatgcc<br>agagccagcg aagtct<br>R-TTAGGCGCCG GTGGAGTGGC   |
| <i>Hdac1 CDS</i>   | T7-F-TAATACGACTCACTATAGGGAGAatg ggcgagactc<br>agggcac<br>R-TCAGGCCAAC TTGACCTCTT CT |
| <i>Hdac2 CDS</i>   | T7-TAATACGACTCACTATAGGGAGAat ggcgtacagt<br>caaggaggc<br>R-TCAAGGGTTG CTGAGTTGTT CT  |

779

780

781 **Table S3.**

782 List of antibodies used for immunofluorescence and Western Blot

| Target     | Source | Dilution | Company                   | Catalogue     |
|------------|--------|----------|---------------------------|---------------|
| Nanog      | Rabbit | 1:200    | Cell Signaling Technology | 8822          |
| H3K4me3    | Rabbit | 1:200    | Cell Signaling Technology | 9751          |
| H3K9me2    | Rabbit | 1:200    | Cell Signaling Technology | 9753          |
| E-Cadherin | Rat    | 1:1000   | Sigma                     | U3254         |
| DNMT3A     | Mouse  | 1:200    | Novus Biologicals         | NB120-13888SS |
| DNMT3B     | Mouse  | 1:200    | Novus Biologicals         | 52A1018       |
| TEAD4      | Mouse  | 1:200    | Abcam                     | ab58310       |
| H4K5ac     | Rabbit | 1:200    | Abcam                     | ab51997       |
| H3K14ac    | Rabbit | 1:200    | Abcam                     | ab52946       |
| P-H3S10    | Rabbit | 1:1000   | Cell Signaling Technology | 3377          |

|                           |        |                |                           |              |
|---------------------------|--------|----------------|---------------------------|--------------|
| 5mc                       | Mouse  | 1:200          | Eurogentec                | BI-MECY-1000 |
| 5-hmC                     | Rabbit | 1:200          | Active Motif              | 39791        |
| HDAC2                     | Rabbit | 1:200          | Abcam                     | ab32117      |
| $\alpha$ -Tubulin         | Rabbit | 1:100          | Cell Signaling Technology | 2125         |
| HDAC1                     | Mouse  | 1:200          | Cell Signaling Technology | 5356         |
| CDX2                      | Mouse  | 1:200          | BioGenex                  | CDX2-88      |
| OCT3/4                    | Mouse  | 1:200          | Santa Cruz                | sc-5279      |
| SOX2                      | Rabbit | 1:50           | Millipore                 | AB5603       |
| YAP                       | Mouse  | 1:200          | Santa Cruz                | sc-101200    |
| GATA6                     | Goat   | 1:200          | R&D Systems               | AF1700       |
| SOX17                     | Goat   | 1:200          | R&D Systems               | AF1924       |
| Uhrf1                     | Mouse  | 1:200          | Santa Cruz                | sc-373750    |
| P53-acetyl-lys379         | Rabbit | 1:200          | GeneTex                   | GTX88013     |
| $\beta$ -actin            | Mouse  | 1:1000<br>(WB) | Beyotime                  | AF0003       |
| Donkey anti-Rabbit<br>594 |        | 1:1000         | Invitrogen                | A21207       |
| Goat anti-Mouse<br>488    |        | 1:1000         | Invitrogen                | A11001       |
| Donkey anti-Mouse<br>594  |        | 1:1000         | Invitrogen                | A11032       |
| Donkey anti-Goat<br>594   |        | 1:1000         | Invitrogen                | A11058       |
| Goat anti-Rat 488         |        | 1:1000         | Invitrogen                | A11006       |
| Goat anti-Rabbit<br>488   |        | 1:1000         | Invitrogen                | A11008       |
| Donkey anti-Mouse<br>488  |        | 1:1000         | Invitrogen                | A21206       |
